# Supplementary material for: Germinal center B cell maintenance and differentiation are controlled by distinct NF-κB transcription factor subunits
Source: PubMed Central journal article supplement — J Exp Med. 2014 Sep 22;211(10):2103–18. doi: 10.1084/jem.20132613 (PMC4172226; doi:10.1084/jem.20132613), 2014-09-22
Supplement: supp_jem.20132613_JEM_20132613_sm.pdf [file supp_jem.20132613_JEM_20132613_sm.pdf]

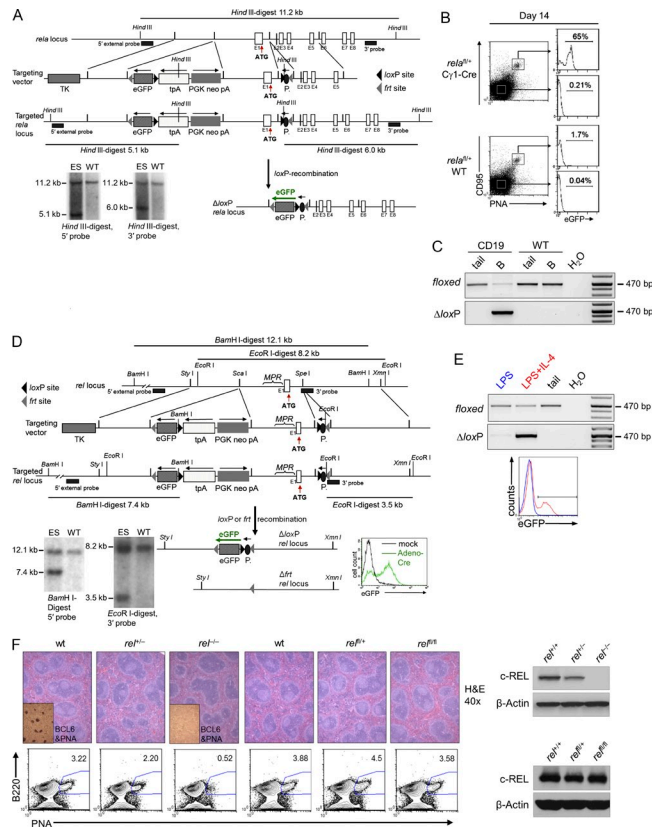

**Figure S1. Generation and functional analysis of the conditional *rela* and *rel* alleles.** (A) *Rela* (RELA) targeting strategy. Shown from top to bottom: the *rela* locus with the promoter region, exons, and translational start site in exon 1 (E1); the targeting vector comprising an eGFP, a triple SV40 polyA site (tpA), a PGK *neopA* cassette, a PGK promoter (P) downstream of exon 1, a TK gene, and *loxP* and *frt* sites; arrows denote the orientation; the targeted *rela* locus; and the locus after Cre-mediated recombination of *loxP* sites. Restriction sites, probes used for detection, and the expected fragments detected by Southern blot analysis are indicated. (Bottom left) Correctly targeted embryonic stem (ES) cell lines were identified by Southern blot analysis of HindIII-digested DNA that displayed the 5.1 kb band of the integrated transgene along with the 11.2 kb wild-type (WT) band. Co-integration of the 3' *loxP* site was verified by the presence of the expected 6.0 kb transgenic band. (B) Flow cytometric analysis of splenic B cells (gated on B220<sup>+</sup>) from *rela*<sup>fl/+</sup>-Cγ1-Cre and *rela*<sup>fl/+</sup> control mice 14 d after SRBC immunization for the fraction of eGFP<sup>+</sup> GC (CD95<sup>hi</sup>PNA<sup>hi</sup>) and non-GC (CD95<sup>hi</sup>PNA<sup>-</sup>) B cells. Numbers in histograms indicate percent eGFP<sup>+</sup> cells in the respective gates. (C) PCR to identify B cell-specific deletion of *rela*. DNA was isolated from the tail and purified B cells of *rela*<sup>fl/+</sup>-CD19-Cre and *rela*<sup>fl/+</sup> control mice. The forward primer is located in the eGFP gene, and the reverse primers are located in the junctions of the 5' *loxP* site and the tpA gene, and the 3' *loxP* site and the PGK promoter, respectively. (D) *Rel* (c-REL) targeting strategy. Shown from top to bottom: the *rel* locus with the minimal promoter region (MPR) and translational start site in exon 1 (E1); the targeting vector comprising an eGFP, a tpA site, a PGK *neopA* cassette, a PGK promoter (P) downstream of exon 1, a TK gene, and *loxP* and *frt* sites; arrows denote the orientation; the targeted *rel* locus; the locus after Cre-mediated recombination of *loxP* sites; and the locus after Flpe-mediated recombination of *frt* sites. Restriction sites, probes used for detection, and the expected fragments detected by Southern blot analysis are indicated. (Bottom left) Correctly targeted ES cell lines were identified by Southern blot analysis of BamHI-digested DNA that displayed the 7.4 kb band of the integrated transgene along with the 12.1 kb WT band. Co-integration of the 3' *loxP* site was verified by analysis of EcoRI-digested DNA that displayed the 3.5 kb transgenic band along with the 8.2 kb WT band. (Bottom right) Flow cytometry of eGFP expression by Adeno-Cre-treated *rel*<sup>fl/+</sup> ES cells after *loxP*-mediated deletion of the *rel* locus. (E, top) PCR strategy to identify specific deletion of *rel* in B cells purified from *rel*<sup>fl/+</sup>-Cγ1-Cre mice upon induction of class-switch recombination with LPS+IL-4. DNA isolated from cultures treated with LPS alone and tail DNA of these mice served as negative control. The forward primer is located in the eGFP gene, and the reverse primers are located in the junctions of the 5' *loxP* site and the tpA gene, and the 3' *loxP* site and the PGK promoter, respectively. (E, bottom) Flow cytometric analysis of the same B cell cultures for eGFP expression. (F, left) IHC analysis of splenic sections for GCs by PNA and BCL6 co-staining (purple), and flow cytometric analysis of splenic B cells of *rel*<sup>-/-</sup>, *rel*<sup>fl/-</sup>, *rel*<sup>fl/fl</sup>, *rel*<sup>fl/+</sup>, and wild-type littermates 14 d after SRBC immunization. *rel*<sup>-/-</sup> mice show impaired formation of GCs, in agreement with the literature (see main text), demonstrating that the newly generated conditional *rel* allele ablates the function of c-REL upon deletion. *rel*<sup>fl/fl</sup> mice show normal generation of GCs, demonstrating that the *loxP*-flanked conditional *rel* allele produces physiological amounts of c-REL despite the insertion of several gene cassettes into the *rel* locus. (Right) Western blot analysis of B cells isolated from *rel*<sup>-/-</sup>, *rel*<sup>fl/-</sup>, *rel*<sup>fl/fl</sup>, *rel*<sup>fl/+</sup>, and wild-type littermates demonstrating that the newly generated conditional *rel* allele does not express c-REL protein upon deletion, and that the *loxP*-flanked allele in un-rearranged configuration produces normal amounts of c-REL protein.

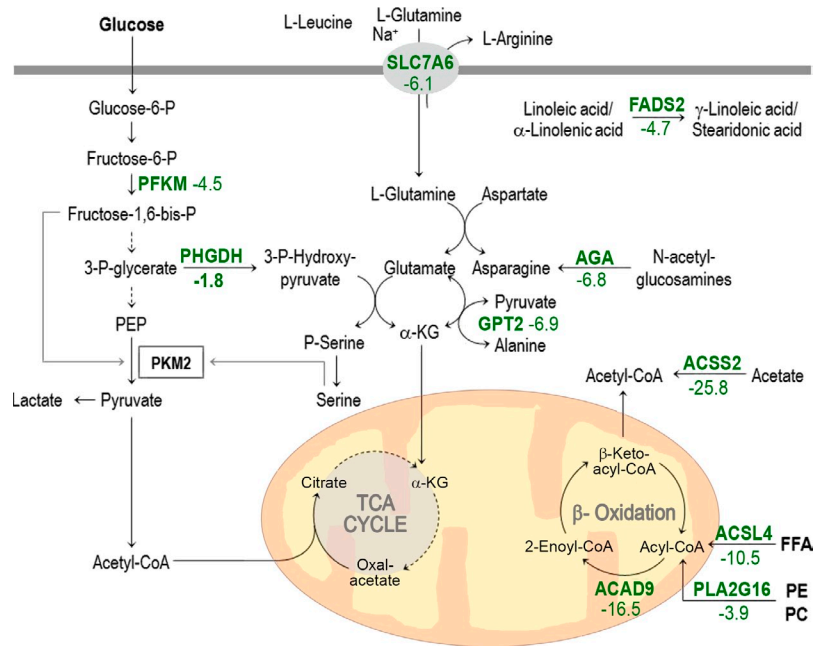

**Figure S2.** Chart depicting metabolic pathways that seem to be affected by the failed up-regulation of genes (indicated by green color) in **c-REL-deficient GC B cells**. The fold difference of the relative expression between the GC B cell fractions from *rel<sup>fl/fl</sup>Cγ1-Cre* and *Cγ1-Cre* mice is indicated. α-KG, α-Ketoglutarate.

**Table S1.** Genes differentially expressed in c-REL-deficient vs. wild-type GC B cells.**Genes downregulated in c-REL-deficient GC B cells**

| Z-score | Probe set    | Gene Symbol   | Category                 | Fold change |
|---------|--------------|---------------|--------------------------|-------------|
| 29.519  | 1432604_at   | Rbl1          | Cell Cycle/Proliferation | 23.5        |
| 28.997  | 1425604_at   | Crkl          | Signaling                | 18.4        |
| 21.892  | 1425307_at   | Dnahc1        | Cytoskeleton/Structure   | 9.0         |
| 18.823  | 1430460_at   | Fam188a       | Unknown                  | 21.4        |
| 17.842  | 1425124_at   | Rnf183        | Unknown                  | 8.3         |
| 14.727  | 1432027_a_at | Tbc1d14       | Unknown                  | 5.1         |
| 12.871  | 1446136_at   | Sik3          | Unknown                  | 11.6        |
| 11.85   | 1435276_a_at | Dgcr2         | Migration/Adhesion       | 16.8        |
| 11.638  | 1418389_at   | 2810453I06Rik | Unknown                  | 9.5         |
| 11.586  | 1420044_at   | Osbp19        | Transporter Protein      | 3.0         |
| 10.188  | 1441062_at   | Ddx11         | RNA Metabolism           | 7.3         |
| 9.386   | 1442566_at   | C78878        | Unknown                  | 13.5        |
| 9.044   | 1452801_at   | Pigk          | Miscellaneous            | 10.8        |
| 9.008   | 1453490_at   | Sass6         | Cell Cycle/Proliferation | 4.0         |
| 8.897   | 1452650_at   | Trim62        | Unknown                  | 192.2       |
| 8.64    | 1439710_at   | Tgs1          | RNA Metabolism           | 8.7         |
| 8.445   | 1449170_at   | Piwil2        | Miscellaneous            | 18.1        |
| 8.432   | 1438317_a_at | Endog         | DNA Metabolism           | 3.5         |
| 7.848   | 1440054_at   | Pik3ca        | Signaling                | 19.1        |
| 7.793   | 1439387_x_at | Ctu2          | RNA Metabolism           | 2.4         |
| 7.778   | 1457964_at   | 1810044D09Rik | Unknown                  | 12.0        |
| 7.684   | 1453743_x_at | Phf14         | Transcription Factor     | 5.8         |
| 7.671   | 1457216_at   | -             | Unknown                  | 90.1        |
| 7.492   | 1416507_at   | Cnpy2         | Miscellaneous            | 25.9        |
| 7.366   | 1416262_at   | Tmem19        | Unknown                  | 5.0         |
| 7.325   | 1449629_s_at | -             | Unknown                  | 42.1        |
| 7.305   | 1442433_at   | -             | Unknown                  | 16.8        |
| 7.301   | 1457031_at   | Fsd2          | Unknown                  | 13.7        |
| 7.202   | 1448190_at   | Mrpl33        | Miscellaneous            | 2.9         |
| 7.189   | 1439932_at   | Ubxn2b        | Cell Cycle/Proliferation | 5.1         |
| 7.177   | 1429939_at   | Ppp6r3        | Signaling                | 32.5        |
| 7.139   | 1435215_at   | -             | Unknown                  | 4.9         |
| 7.102   | 1434588_x_at | Tbca          | Cytoskeleton/Structure   | 17.9        |
| 6.999   | 1441163_at   | Med12l        | Transcription            | 15.7        |
| 6.917   | 1447409_at   | -             | Unknown                  | 18.2        |
| 6.851   | 1422616_s_at | Wdr54         | Unknown                  | 12.9        |
| 6.843   | 1454243_at   | Ick           | Signaling                | 36.9        |
| 6.832   | 1451363_a_at | Dennd2d       | Unknown                  | 3.1         |
| 6.805   | 1444394_at   | Acad9         | Metabolism               | 16.5        |
| 6.671   | 1420594_at   | Bard1         | DNA Metabolism           | 5.0         |
| 6.645   | 1421087_at   | Per3          | Miscellaneous            | 31.6        |
| 6.573   | 1436058_at   | Rsad2         | Immune Response          | 30.3        |
| 6.476   | 1416319_at   | Adk           | Metabolism               | 3.5         |
| 6.464   | 1439738_at   | Mettl13       | Miscellaneous            | 9.5         |
| 6.459   | 1453168_at   | 1700029J07Rik | Unknown                  | 118.8       |
| 6.411   | 1440183_x_at | 2810002N01Rik | Miscellaneous            | 36.8        |
| 6.343   | 1435403_at   | 1700007L15Rik | Unknown                  | 21.2        |
| 6.262   | 1436833_x_at | Till1         | Cytoskeleton/Structure   | 35.9        |
| 6.241   | 1446405_at   | Myst3         | DNA metabolism           | 9.1         |
| 6.182   | 1439876_at   | Vti1a         | Cellular Trafficking     | 62.6        |
| 6.12    | 1438294_at   | Atxn1         | Transcription            | 105.4       |
| 6.045   | 1434173_s_at | D19Bwg1357e   | Unknown/Miscellaneous    | 2.9         |
| 5.928   | 1422479_at   | Acss2         | Metabolism               | 25.8        |
| 5.897   | 1453359_at   | Exosc1        | RNA Metabolism           | 3.4         |
| 5.893   | 1436737_a_at | Sorbs1        | Signaling                | 43.0        |
| 5.837   | 1417985_at   | Nrarp         | Signaling                | 8.4         |

|       |              |                |                          |       |
|-------|--------------|----------------|--------------------------|-------|
| 5.766 | 1419773_at   | Aplf           | DNA metabolism           | 64.2  |
| 5.727 | 1433658_x_at | Pcbp4          | RNA Metabolism           | 3.4   |
| 5.727 | 1456844_at   | Camk2d         | Signaling                | 4.2   |
| 5.689 | 1433266_at   | 2810416A17Rik  | Unknown                  | 101.0 |
| 5.591 | 1439422_a_at | Fam132a        | Metabolism               | 26.9  |
| 5.553 | 1430904_at   | Arfgap3        | Cellular Trafficking     | 40.2  |
| 5.527 | 1435554_at   | Tmcc3          | Unknown                  | 27.9  |
| 5.508 | 1436024_at   | Fam113a        | Unknown                  | 5.8   |
| 5.469 | 1452757_s_at | Hba-a1 Hba-a2  | Miscellaneous            | 23.0  |
| 5.452 | 1447904_s_at | Fnta           | Miscellaneous            | 1.9   |
| 5.449 | 1424580_at   | Slc35a3        | Membrane Transport       | 13.3  |
| 5.412 | 1423672_at   | Ttc30b         | Cellular Trafficking     | 23.8  |
| 5.4   | 1431618_a_at | Pibf1          | Immune Response          | 10.5  |
| 5.27  | 1431252_a_at | Zfp655         | Unknown                  | 21.9  |
| 5.26  | 1442594_at   | Ttk            | Cell Cycle/Proliferation | 2.8   |
| 5.256 | 1423432_at   | Phip           | Signaling                | 2.8   |
| 5.168 | 1444312_at   | Slc22a15       | Membrane Transport       | 3.1   |
| 5.104 | 1459020_at   | Amigo1         | Miscellaneous            | 20.7  |
| 5.081 | 1434576_at   | Tsga14         | Unknown                  | 6.9   |
| 4.979 | 1455007_s_at | Gpt2           | Metabolism               | 6.9   |
| 4.951 | 1437980_at   | 9130230N09Rik  | Unknown                  | 7.9   |
| 4.934 | 1445984_at   | -              | Unknown                  | 4.4   |
| 4.912 | 1429173_at   | Dnase111       | DNA metabolism           | 18.1  |
| 4.896 | 1423266_at   | 2810405K02Rik  | Unknown                  | 18.9  |
| 4.893 | 1453622_s_at | Mllt3          | Transcription            | 4.3   |
| 4.875 | 1445329_at   | Dtnb           | Miscellaneous            | 6.9   |
| 4.854 | 1456805_a_at | Ppp4r1-ps      | Unknown                  | 24.2  |
| 4.853 | 1426147_s_at | Cldn10         | Cytoskeleton/Structure   | 24.2  |
| 4.828 | 1460098_at   | -              | Unknown                  | 17.2  |
| 4.648 | 1427005_at   | Plk2           | Cell Cycle/Proliferation | 14.2  |
| 4.641 | 1434919_at   | Agps           | Metabolism               | 2.5   |
| 4.639 | 1454018_at   | Ttk2           | Chromatin                | 8.8   |
| 4.612 | 1428568_at   | B230217C12Rik  | Unknown                  | 9.5   |
| 4.606 | 1446177_at   | -              | Unknown                  | 34.6  |
| 4.603 | 1460632_at   | Rdh10          | Metabolism               | 6.1   |
| 4.559 | 1432548_at   | Parp14         | Metabolism               | 7.1   |
| 4.524 | 1419269_at   | Dut            | DNA metabolism           | 3.6   |
| 4.522 | 1443057_at   | -              | Unknown                  | 5.7   |
| 4.508 | 1444571_at   | -              | Unknown                  | 27.9  |
| 4.363 | 1426383_at   | Cry2           | Miscellaneous            | 6.5   |
| 4.358 | 1427073_at   | Lace1          | Unknown                  | 3.7   |
| 4.335 | 1453386_at   | Tusc1          | Unknown                  | 28.4  |
| 4.326 | 1441685_at   | Prosc          | Unknown                  | 11.6  |
| 4.324 | 1441373_at   | -              | Unknown                  | 4.4   |
| 4.31  | 1419031_at   | Fads2          | Metabolism               | 4.7   |
| 4.294 | 1418967_a_at | St7            | Unknown/Miscellaneous    | 172.1 |
| 4.267 | 1440781_at   | B830007D08Rik  | Unknown                  | 8.8   |
| 4.258 | 1416780_at   | Pfkm           | Metabolism               | 4.5   |
| 4.253 | 1434168_at   | Peo1           | DNA Metabolism           | 3.3   |
| 4.202 | 1455787_x_at | Minpp1         | Metabolism               | 2.0   |
| 4.187 | 1445597_s_at | Pla2g16        | Metabolism               | 3.9   |
| 4.182 | 1434926_at   | Arhgef11       | Signaling                | 5.9   |
| 4.162 | 1438169_a_at | Frmd4b         | Signaling                | 11.1  |
| 4.111 | 1460164_at   | Spin1          | Cell Cycle/Proliferation | 5.1   |
| 4.086 | 1438970_x_at | 1700034F02Rik  | Unknown                  | 13.2  |
| 4.074 | 1428269_a_at | Glt8d1         | Miscellaneous            | 3.0   |
| 4.061 | 1440254_at   | Snord104       | RNA metabolism           | 3.6   |
| 3.994 | 1448520_at   | Dclre1b        | DNA metabolism           | 13.8  |
| 3.993 | 1451611_at   | Pla2g16        | Metabolism               | 3.6   |
| 3.987 | 1415943_at   | Sdc1           | Miscellaneous            | 5.8   |
| 3.958 | 1421692_at   | Cacna1e        | Membrane Transport       | 10.2  |
| 3.956 | 1421895_at   | Eif2s3x Gm2223 | Translation              | 5.1   |

|       |              |                 |                                |      |
|-------|--------------|-----------------|--------------------------------|------|
| 3.938 | 1439913_at   | Pabpc1l         | Unknown                        | 10.2 |
| 3.91  | 1437828_s_at | Wdr46           | Unknown                        | 12.0 |
| 3.898 | 1458896_at   | Gmeb1           | Transcription                  | 13.4 |
| 3.894 | 1426965_at   | Rap2a           | Signaling                      | 5.9  |
| 3.888 | 1418301_at   | Irf6            | Transcription Factor           | 17.4 |
| 3.878 | 1457873_at   | -               | Unknown                        | 13.0 |
| 3.847 | 1437279_x_at | Sdc1            | Miscellaneous                  | 15.1 |
| 3.846 | 1418942_at   | Ift74           | Cellular Trafficking           | 7.3  |
| 3.84  | 1452504_s_at | Ctbs            | Miscellaneous                  | 10.9 |
| 3.817 | 1446926_at   | Pycard          | Immune Response                | 5.7  |
| 3.811 | 1430127_a_at | Ccnd2           | Cell Cycle/Proliferation       | 6.8  |
| 3.806 | 1441880_x_at | Tmem149 U2af114 | RNA Metabolism                 | 6.1  |
| 3.758 | 1424760_a_at | Smyd2           | Miscellaneous                  | 6.7  |
| 3.758 | 1422709_a_at | Wdr46           | Unknown                        | 5.9  |
| 3.756 | 1416002_x_at | Cotl1           | Cytoskeleton/Structure         | 4.6  |
| 3.74  | 1437800_at   | Edaradd         | Signaling                      | 13.0 |
| 3.732 | 1418826_at   | Ms4a6b          | Signaling                      | 3.3  |
| 3.727 | 1438452_at   | Nebi            | Cytoskeleton/Structure         | 6.7  |
| 3.702 | 1445655_at   | -               | Unknown                        | 29.7 |
| 3.698 | 1433670_at   | Emp2            | Cytoskeleton/Membrane Function | 13.0 |
| 3.685 | 1443763_at   | -               | Unknown                        | 7.3  |
| 3.681 | 1437621_x_at | Phgdh           | Metabolism                     | 1.8  |
| 3.657 | 1437374_at   | Zfp865          | Miscellaneous                  | 3.6  |
| 3.656 | 1448626_at   | Cdk5rap1        | Miscellaneous                  | 5.3  |
| 3.645 | 1452977_at   | Zhx3            | Transcription Factor           | 16.0 |
| 3.632 | 1436376_s_at | Srbd1           | Unknown                        | 3.3  |
| 3.583 | 1439648_at   | Anln            | Cytoskeleton/Structure         | 6.5  |
| 3.58  | 1429205_at   | Mllt3           | Transcription                  | 5.4  |
| 3.573 | 1421167_at   | Atp11a          | Membrane Transport             | 5.5  |
| 3.573 | 1419801_x_at | -               | Unknown                        | 4.6  |
| 3.565 | 1429337_at   | Tmem87b         | Unknown                        | 17.8 |
| 3.555 | 1432073_at   | Aarsd1 Ptges3l  | Miscellaneous                  | 9.9  |
| 3.497 | 1438796_at   | Nr4a3           | Transcription Factor           | 16.7 |
| 3.418 | 1428471_at   | Sorbs1          | Signaling                      | 6.4  |
| 3.388 | 1449374_at   | Pipox           | Metabolism                     | 4.8  |
| 3.324 | 1417512_at   | Evi5            | Cell Cycle/Proliferation       | 6.0  |
| 3.303 | 1420784_at   | Scn11a          | Membrane Transport             | 14.2 |
| 3.262 | 1428142_at   | Etv5            | Transcription Factor           | 4.7  |
| 3.241 | 1446757_at   | -               | Unknown                        | 8.0  |
| 3.238 | 1445625_at   | -               | Unknown                        | 8.9  |
| 3.21  | 1435342_at   | Kcnk6           | Membrane Transport             | 2.3  |
| 3.202 | 1416163_at   | Cops4           | Signaling                      | 2.3  |
| 3.188 | 1418911_s_at | Acsl4           | Metabolism                     | 10.5 |
| 3.166 | 1435503_at   | C330006K01Rik   | DNA metabolism                 | 6.4  |
| 3.146 | 1427269_at   | Srsf11          | Miscellaneous                  | 4.8  |
| 3.126 | 1455433_at   | Zfp942          | Unknown                        | 2.8  |
| 3.125 | 1446345_at   | -               | Unknown                        | 12.9 |
| 3.071 | 1437163_x_at | Gtf2h4          | RNA Metabolism                 | 4.3  |
| 2.969 | 1430131_at   | Cr1l            | (Innate) Immune Response       | 3.6  |
| 2.954 | 1431127_at   | Zbtb43          | Unknown                        | 9.6  |
| 2.947 | 1440308_at   | Cmpk1           | DNA metabolism                 | 17.9 |
| 2.938 | 1450914_at   | Ppp1r14b        | Signaling                      | 2.7  |
| 2.867 | 1434951_at   | Armc8           | Unknown                        | 9.5  |
| 2.858 | 1429712_at   | Etohi1          | Unknown                        | 4.5  |
| 2.812 | 1424331_at   | Rab40c          | Protein Degradation            | 4.5  |
| 2.793 | 1440388_at   | -               | Unknown                        | 8.5  |
| 2.763 | 1435252_at   | B3galt6         | Miscellaneous                  | 4.9  |
| 2.756 | 1456000_at   | Ddx18           | RNA Metabolism                 | 6.2  |
| 2.737 | 1438957_x_at | Cds2            | Signaling                      | 4.5  |
| 2.72  | 1436635_at   | Ube2z           | Protein Degradation            | 4.7  |
| 2.7   | 1421600_a_at | Trim26          | Unknown                        | 5.1  |
| 2.685 | 1432352_at   | Ccny            | Cell Cycle/Proliferation       | 10.6 |

|       |              |               |                     |      |
|-------|--------------|---------------|---------------------|------|
| 2.639 | 1433467_at   | Slc7a6        | Metabolism          | 6.1  |
| 2.606 | 1424772_at   | H2afj         | Chromatin           | 7.6  |
| 2.576 | 1418647_at   | Gnl1          | Miscellaneous       | 7.9  |
| 2.576 | 1450385_at   | Kpna3         | Membrane Transport  | 12.5 |
| 2.572 | 1439249_at   | Wac           | Miscellaneous       | 8.1  |
| 2.54  | 1451146_at   | Zfp386        | Unknown             | 5.1  |
| 2.526 | 1451570_a_at | Fam92a        | Unknown             | 3.5  |
| 2.507 | 1434665_at   | Aga           | Metabolism          | 6.8  |
| 2.499 | 1436196_at   | C030046G05    | Unknown             | 2.6  |
| 2.493 | 1446680_at   | -             | Unknown             | 9.2  |
| 2.46  | 1426695_at   | 9030624J02Rik | Unknown             | 3.9  |
| 2.357 | 1424630_a_at | Brca1         | DNA Metabolism      | 4.9  |
| 2.345 | 1451313_a_at | 1110067D22Rik | Miscellaneous       | 5.5  |
| 2.307 | 1456038_at   | Fbxl4         | Protein Degradation | 5.7  |
| 2.162 | 1423403_at   | Mapkbp1       | Signaling           | 9.3  |
| 2.136 | 1454402_at   | Zfp942        | Unknown             | 7.5  |

### Genes upregulated in c-REL-deficient GC B cells

| Z-score | Probe set    | Gene Symbol    | Category                 | Fold change |
|---------|--------------|----------------|--------------------------|-------------|
| -70.296 | 1422562_at   | Rrad           | Signaling                | 8.5         |
| -25.151 | 1443489_at   | -              | Unknown                  | 4.6         |
| -17.106 | 1446134_at   | C78115         | Unknown                  | 33.0        |
| -16.527 | 1435527_at   | Nfic           | Transcription            | 12.7        |
| -15.190 | 1449184_at   | Pglyrp1        | (Innate) Immune Response | 2.8         |
| -14.473 | 1448162_at   | Vcam1          | Migration/Adhesion       | 300.0       |
| -10.099 | 1417061_at   | Slc40a1        | Membrane Transport       | 18.7        |
| -8.920  | 1448048_at   | Nmrk1          | Metabolism               | 7.0         |
| -8.556  | 1440604_at   | 8030494B02Rik  | Unknown                  | 5.9         |
| -8.366  | 1460466_at   | 1700047I17Rik2 | Unknown                  | 4.7         |
| -8.159  | 1442132_at   | -              | Unknown                  | 16.9        |
| -7.652  | 1417063_at   | C1qb           | (Innate) Immune Response | 22.8        |
| -7.509  | 1442685_at   | -              | Unknown                  | 43.2        |
| -7.092  | 1424598_at   | Ddx6           | RNA Metabolism           | 3.4         |
| -6.767  | 1457503_at   | -              | Unknown                  | 4.7         |
| -6.726  | 1419873_s_at | Csf1r          | (Innate) Immune Response | 22.0        |
| -6.682  | 1425740_at   | Suv420h1       | Unknown                  | 6.4         |
| -6.492  | 1420954_a_at | Add1           | Cytoskeleton/Structure   | 11.8        |
| -6.416  | 1418728_at   | Star           | Metabolism               | 8.8         |
| -6.206  | 1434366_x_at | C1qb           | (Innate) Immune Response | 33.0        |
| -6.161  | 1419872_at   | Csf1r          | (Innate) Immune Response | 25.3        |
| -6.003  | 1433804_at   | Jak1           | Signaling                | 3.3         |
| -5.726  | 1449401_at   | C1qc           | (Innate) Immune Response | 64.5        |
| -5.703  | 1447137_at   | -              | Unknown                  | 94.7        |
| -5.683  | 1450430_at   | Mrc1           | Miscellaneous            | 19.2        |
| -5.645  | 1449134_s_at | Spic           | Transcription Factor     | 13.2        |
| -5.615  | 1446838_at   | Atad1          | Miscellaneous            | 5.0         |
| -5.604  | 1450068_at   | Baz1b          | Chromatin                | 3.0         |
| -5.541  | 1443684_at   | Gm10034        | Unknown                  | 12.1        |
| -5.535  | 1438425_at   | Gtf3c1         | Transcription            | 15.5        |
| -5.349  | 1437726_x_at | C1qb           | Innate Immune Response   | 34.6        |
| -5.270  | 1457053_at   | -              | Unknown                  | 6.0         |
| -5.270  | 1456378_s_at | Fbxl20         | Protein Degradation      | 5.6         |
| -5.241  | 1453122_at   | Fam135a        | Unknown                  | 14.6        |
| -5.184  | 1424986_s_at | Fbxw7          | Protein Degradation      | 4.4         |
| -5.092  | 1431355_s_at | Trpm7          | Membrane Transport       | 5.0         |
| -5.057  | 1440331_at   | Kdsr           | Metabolism               | 17.1        |
| -4.991  | 1437021_at   | Arl13b         | Cellular Trafficking     | 7.0         |
| -4.987  | 1457678_at   | 2310035C23Rik  | Unknown                  | 3.6         |
| -4.849  | 1435471_at   | Zfp708         | Unknown                  | 9.3         |
| -4.844  | 1449838_at   | Crisp3         | Unknown                  | 7.0         |
| -4.673  | 1443125_at   | Trip12         | Protein Degradation      | 8.4         |
| -4.596  | 1453512_at   | 5830407P18Rik  | Unknown                  | 26.5        |

|        |                            |                  |                          |      |
|--------|----------------------------|------------------|--------------------------|------|
| -4.595 | 1429583_at                 | 2900053A13Rik    | Unknown                  | 7.3  |
| -4.567 | 1436491_at                 | Gm11346          | Unknown                  | 9.3  |
| -4.406 | 1441493_at                 | Erc1             | Signaling                | 5.2  |
| -4.343 | 1440577_at                 | -                | Unknown                  | 11.9 |
| -4.323 | 1426998_at                 | Zfand3           | Unknown                  | 4.3  |
| -4.301 | 1429871_at                 | Hmmr             | Miscellaneous            | 4.3  |
| -4.259 | 1458151_at                 | 4833444G19Rik    | Unknown                  | 5.0  |
| -4.250 | 1425398_at                 | Hist1h2bf        | Chromatin                | 8.1  |
| -4.235 | 1428423_at                 | Pcgf3            | Unknown                  | 4.1  |
| -4.012 | 1459924_at                 | Atp6v0a1         | Membrane Transport       | 22.2 |
| -3.995 | 1424585_at                 | Ranbp10          | Miscellaneous            | 3.5  |
| -3.967 | 1438714_at                 | -                | Unknown                  | 3.9  |
| -3.951 | 1445103_at                 | -                | Unknown                  | 8.3  |
| -3.947 | 1441142_at                 | 2700081L22Rik    | Unknown                  | 29.6 |
| -3.903 | 1432798_at                 | Slc12a6          | Membrane Transport       | 16.2 |
| -3.842 | 1456276_at                 | -                | Unknown                  | 28.1 |
| -3.814 | 1439041_at                 | Slc39a10         | Membrane Transport       | 6.7  |
| -3.762 | 1458064_at                 | -                | Unknown                  | 8.4  |
| -3.761 | 1441178_at                 | Dtwd2            | Unknown                  | 12.5 |
| -3.743 | 1424498_at                 | Ati3             | Cytoskeleton/Structure   | 6.9  |
| -3.737 | 1446735_at                 | -                | Unknown                  | 3.2  |
| -3.722 | 1444159_at                 | -                | Unknown                  | 4.3  |
| -3.715 | 1458017_at                 | Phf20            | Chromatin                | 4.6  |
| -3.661 | 1424944_at                 | Pcp2             | Miscellaneous            | 5.0  |
| -3.640 | 1441848_at                 | -                | Unknown                  | 29.2 |
| -3.634 | 1458051_at                 | A230048O21Rik    | Unknown                  | 4.4  |
| -3.633 | 1456494_a_at               | Trim30a; Trim30d | Signaling                | 6.5  |
| -3.617 | 1426516_a_at               | Lpin1            | Metabolism               | 6.0  |
| -3.588 | 1428878_a_at               | Pitpnc1          | Membrane Transport       | 4.2  |
| -3.553 | 1444519_at                 | Lgr5             | Signaling                | 6.5  |
| -3.550 | 1441565_at                 | -                | Unknown                  | 9.5  |
| -3.447 | 1419604_at                 | Zbp1             | (Innate) Immune Response | 6.2  |
| -3.423 | 1439930_at                 | -                | Unknown                  | 5.5  |
| -3.378 | 1430404_at                 | LOC75771         | Unknown                  | 3.4  |
| -3.372 | 1443517_at                 | Fam178a          | Unknown                  | 5.6  |
| -3.370 | 1457628_at                 | Ccdc53           | Cytoskeleton/Structure   | 4.5  |
| -3.332 | 1459384_at                 | -                | Unknown                  | 13.7 |
| -3.328 | 1436780_at                 | Ogt              | Chromatin                | 4.1  |
| -3.249 | 1416702_at                 | Serpini1         | Miscellaneous            | 5.5  |
| -3.239 | 1418327_at                 | 1110058L19Rik    | Unknown                  | 3.0  |
| -3.204 | 1457685_at                 | Zfp81            | Miscellaneous            | 6.3  |
| -3.191 | 1444962_at                 | Gm7609           | Unknown                  | 4.5  |
| -3.191 | 1419798_at                 | 2610019E17Rik    | Unknown                  | 5.8  |
| -3.184 | 1441324_at                 | -                | Unknown                  | 5.2  |
| -3.123 | 1442804_at                 | Fgr              | Migration/Adhesion       | 3.7  |
| -3.101 | 1443082_at                 | -                | Unknown                  | 5.2  |
| -3.039 | 1439938_at                 | Stk38            | Signaling                | 8.2  |
| -3.035 | AFFX-18SRNAMur/X00686_5_at |                  |                          |      |
| -2.935 | 1459955_at                 | -                | Unknown                  | 9.5  |
| -2.922 | 1441200_at                 | Klf3             | Miscellaneous            | 12.8 |
| -2.896 | 1431316_at                 | Itch             | Protein Degradation      | 10.6 |
| -2.882 | 1452940_x_at               | Pitpnc1          | Membrane Transport       | 6.5  |
| -2.848 | 1456172_at                 | -                | Unknown                  | 8.8  |
| -2.847 | 1424990_at                 | Orai1            | Membrane Transport       | 3.8  |
| -2.829 | 1438033_at                 | Tef              | Transcription Factor     | 10.1 |

**Table S2.** Genes not induced in c-REL-deficient vs. wild-type B cells by  $\geq 2$ -fold.

**6 hours CD40 + IgM stimulation**

| gene                              | gene name                                               | fold change | padj        |
|-----------------------------------|---------------------------------------------------------|-------------|-------------|
| <b>Cytoskeleton&amp;structure</b> |                                                         |             |             |
| Myo1g                             | myosin IG                                               | 2.6         | 1.96E-155   |
| Shank1                            | SH3 and multiple ankyrin repeat domains 1               | 2.2         | 1.15E-77    |
| Coro2a                            | coronin, actin binding protein, 2A                      | 2.0         | 1.37E-66    |
| Psrc1                             | proline/serine-rich coiled-coil 1                       | 2.9         | 8.05E-32    |
| Agm                               | agrin                                                   | 2.0         | 2.72E-31    |
| Kank3                             | KN motif and ankyrin repeat domains 3                   | 2.1         | 9.97E-11    |
| Zfp365                            | zinc finger protein 365                                 | 3.9         | 2.37E-10    |
| Bmp1                              | bone morphogenetic protein 1                            | 3.0         | 5.57E-05    |
| Spon1                             | spondin 1, extracellular matrix protein                 | 2.1         | 3.29E-03    |
| Chst1                             | carbohydrate (keratan sulfate Gal-6) sulfotransferase 1 | 5.0         | 0.002266505 |
| <b>Apoptosis</b>                  |                                                         |             |             |
| Bcl2l1                            | BCL2-like 1                                             | 9.2         | 3.86E-244   |
| Bcl2a1d                           | B cell leukemia/lymphoma 2 related protein A1d          | 3.3         | 1.80E-44    |
| Bcl2a1b                           | B cell leukemia/lymphoma 2 related protein A1b          | 2.0         | 1.59E-27    |
| <b>Proliferation</b>              |                                                         |             |             |
| Ccnd2                             | cyclin D2                                               | 2.6         | 3.77E-145   |
| Cdk5r1                            | cyclin-dependent kinase 5, regulatory subunit 1         | 4.1         | 2.05E-52    |
| <b>Immune response</b>            |                                                         |             |             |
| Fam129c                           | family with sequence similarity 129, member C           | 6.0         | 0           |
| Il2ra                             | interleukin 2 receptor, alpha                           | 5.5         | 0           |
| Sh3bp5                            | SH3-domain binding protein 5 (BTK-associated)           | 2.0         | 3.99E-91    |
| Lrrc32                            | leucine rich repeat containing 32                       | 3.7         | 1.53E-51    |
| Mfhas1                            | malignant fibrous histiocytoma amplified sequence 1     | 2.1         | 5.18E-35    |
| Ikke                              | inhibitor of kappaB kinase epsilon                      | 2.5         | 1.58E-33    |
| Havcr1                            | hepatitis A virus cellular receptor 1                   | 2.2         | 1.22E-28    |
| Tnfrsf8                           | tumor necrosis factor receptor superfamily, member 8    | 3.2         | 1.38E-15    |
| Ebi3                              | Epstein-Barr virus induced 3                            | 2.5         | 6.76E-11    |
| Dusp14                            | dual specificity phosphatase 14                         | 2.3         | 1.66E-06    |
| Timd2                             | T cell immunoglobulin and mucin domain containing 2     | 2.0         | 0.003190434 |
| <b>Signalling</b>                 |                                                         |             |             |
| Axl                               | AXL receptor tyrosine kinase                            | 6.0         | 1.73E-283   |
| Gng4                              | guanine nucleotide binding protein (G protein), gamma 4 | 4.3         | 9.50E-212   |
| Fam129a                           | family with sequence similarity 129, member A           | 3.3         | 1.27E-56    |
| Grm6                              | glutamate receptor, metabotropic 6                      | 6.1         | 3.79E-47    |
| Phlda3                            | pleckstrin homology-like domain, family A, member 3     | 3.1         | 2.14E-23    |
| Gpr56                             | G protein-coupled receptor 56                           | 2.4         | 4.60E-11    |
| Meik                              | maternal embryonic leucine zipper kinase                | 2.4         | 3.00E-08    |
| <b>Other</b>                      |                                                         |             |             |
| Tmem132a                          | transmembrane protein 132A                              | 3.6         | 8.73E-34    |
| Reep2                             | receptor accessory protein 2                            | 2.1         | 0.005524572 |
| <b>Unknown</b>                    |                                                         |             |             |
| A1848285                          |                                                         | 3.7         | 3.62E-35    |
| Tmcc3                             | transmembrane and coiled-coil domain family 3           | 2.3         | 1.06E-28    |
| 9030617O03Rik                     |                                                         | 2.3         | 7.57E-15    |
| 6530418L21Rik                     |                                                         | 2.1         | 9.44E-13    |
| Rbm47                             | RNA binding motif protein 47                            | 2.0         | 1.42E-11    |
| BC048355                          |                                                         | 2.0         | 5.92E-06    |
| <b>Metabolism</b>                 |                                                         |             |             |
| Slc15a3                           | solute carrier family 15, member 3                      | 3.3         | 3.84E-171   |
| Dhrs3                             | dehydrogenase/reductase (SDR family) member 3           | 4.1         | 4.98E-18    |
| Mgll                              | monoglyceride lipase                                    | 10.6        | 7.30E-12    |
| Nucb2                             | nucleobindin 2                                          | 2.0         | 1.26E-07    |
| Fads2                             | fatty acid desaturase 2                                 | 2.2         | 0.000198501 |
| <b>Cell trafficking</b>           |                                                         |             |             |
| Syt13                             | synaptotagmin-like 3                                    | 9.7         | 8.88E-32    |
| Kifc3                             | kinesin family member C3                                | 2.4         | 4.34E-10    |
| <b>Transport</b>                  |                                                         |             |             |
| Plscr1                            | phospholipid scramblase 1                               | 3.4         | 9.79E-67    |
| <b>Transcription</b>              |                                                         |             |             |
| Rel                               | reticuloendotheliosis oncogene                          | 12.2        | 0           |
| Phf15                             | PHD finger protein 15                                   | 2.9         | 1.50E-156   |
| Grhl1                             | grainyhead-like 1                                       | 2.5         | 1.00E-33    |
| Snai1                             | snail homolog 1                                         | 2.4         | 6.68E-06    |
| Prdm16                            | PR domain containing 16                                 | 2.2         | 0.005844837 |
| Nr1d1                             | nuclear receptor subfamily 1, group D, member 1         | 2.0         | 0.002266505 |

ordered within groups by p value (less than or equal to 0.01 p adj)

blue color: indicates genes that were identified in both 6 and 24 hour time-point

**24 hours CD40 + IgM stimulation**

| gene                              | gene name               | fold change | padj      |
|-----------------------------------|-------------------------|-------------|-----------|
| <b>Apoptosis</b>                  |                         |             |           |
| Bcl2l1 (BclxL)                    | BCL2-like 1             | 4.9         | 4.04E-240 |
| Bcl2a1d (BFL1)                    | BCL2-related protein A1 | 2.5         | 1.30E-89  |
| Pim1                              | pim-1 oncogene          | 2.8         | 2.88E-70  |
| <b>Cytoskeleton&amp;structure</b> |                         |             |           |
| Mid1                              | midline 1               | 2.4         | 6.34E-70  |
| Myo1g                             | myosin IG               | 2.1         | 6.53E-69  |



|                        |                                                                             |      |           |
|------------------------|-----------------------------------------------------------------------------|------|-----------|
| Hmhr                   | hyaluronan-mediated motility receptor (RHAMM)                               | 3.3  | 2.55E-44  |
| Inf2                   | Inverted Formin, FH2 And WH2 Domain Containing                              | 2.0  | 4.42E-34  |
| Tip2                   | tight junction protein 2                                                    | 2.1  | 4.82E-30  |
| Lad1                   | ladinin 1                                                                   | 3.9  | 6.54E-19  |
| Mtap2                  | Microtubule-Associated Protein 2                                            | 2.3  | 9.24E-18  |
| Bmp1                   | Bone Morphogenetic Protein 1                                                | 4.9  | 1.37E-15  |
| Col9a3                 | collagen, type IX, alpha 3                                                  | 4.3  | 8.03E-10  |
| Tanc1                  | tetratricopeptide repeat, ankyrin repeat and coiled-coil containing 1       | 2.3  | 1.82E-09  |
| Jph1                   | Junctophilin 1                                                              | 12.6 | 3.39E-07  |
| Celsr2                 | cadherin, EGF LAG seven-pass G-type receptor 2                              | 2.0  | 1.37E-05  |
| Dnalc1                 | dynein, axonemal, light chain 1                                             | 2.1  | 3.92E-05  |
| Palm                   | paralemmalin                                                                | 2.8  | 3.94E-05  |
| Grasp                  | GRP1 (General Receptor For Phosphoinositides 1)-Associated Scaffold Protein | 2.8  | 9.88E-05  |
| Jup                    | junction plakoglobin                                                        | 2.2  | 2.53E-04  |
| Gjc1                   | gap junction protein, gamma 1, 45kDa                                        | 3.6  | 9.99E-03  |
| <b>DNA regulation</b>  |                                                                             |      |           |
| Hells                  | helicase, lymphoid-specific                                                 | 2.0  | 6.45E-52  |
| Hmgb2                  | high mobility group box 2                                                   | 2.2  | 3.92E-45  |
| Chaf1a                 | Chromatin Assembly Factor 1, Subunit A                                      | 2.0  | 9.40E-42  |
| Chaf1b                 | chromatin assembly factor 1, subunit B (p60)                                | 2.0  | 1.34E-33  |
| Smyd2                  | SET and MYND domain containing 2                                            | 2.5  | 2.48E-19  |
| Recq4                  | RecQ protein-like 4                                                         | 2.0  | 1.62E-18  |
| Hist1h3c               | histone cluster 1, H3c                                                      | 2.4  | 1.48E-05  |
| Hist1h2bj              | histone cluster 1, H2bj                                                     | 2.0  | 7.21E-04  |
| <b>DNA repair</b>      |                                                                             |      |           |
| Brip1                  | BRCA1 interacting protein C-terminal helicase 1                             | 2.8  | 4.11E-44  |
| Rad51ap1               | RAD51 associated protein 1                                                  | 2.3  | 3.54E-34  |
| Brcal                  | breast cancer 1, early onset                                                | 2.0  | 2.29E-33  |
| Neil3                  | nei endonuclease VIII-like 3 (E. coli)                                      | 2.2  | 3.78E-11  |
| <b>Immune response</b> |                                                                             |      |           |
| Il2ra                  | interleukin 2 receptor, alpha                                               | 3.6  | 1.20E-152 |
| Fam129c                | family with sequence similarity 129, member C                               | 3.3  | 1.34E-145 |
| Ccl22                  | chemokine (C-C motif) ligand 22                                             | 7.0  | 9.16E-124 |
| Havcr1                 | hepatitis A virus cellular receptor 1                                       | 2.3  | 4.60E-63  |
| Tnfrsf14               | tumor necrosis factor (ligand) superfamily, member 14 (LIGHT, LTg)          | 3.8  | 2.76E-55  |
| Spp1                   | secreted phosphoprotein 1                                                   | 3.0  | 1.97E-54  |
| Ccl3                   | chemokine (C-C motif) ligand 3                                              | 2.3  | 2.58E-54  |
| Ifih1                  | 1 interferon induced with helicase C domain 1 (MDA5)                        | 2.8  | 5.56E-51  |
| Selplg                 | selectin P ligand                                                           | 2.0  | 2.65E-42  |
| Cst7                   | cystatin F (leukocystatin)                                                  | 2.5  | 5.76E-26  |
| Tnfrsf9                | tumor necrosis factor (ligand) superfamily, member 9                        | 5.4  | 2.10E-23  |
| Lrrc32                 | leucine rich repeat containing 32                                           | 38.6 | 4.18E-21  |
| Dusp14                 | dual specificity phosphatase 14                                             | 11.8 | 1.91E-19  |
| Timd2                  |                                                                             | 2.7  | 6.93E-18  |
| Ccl1                   | chemokine (C-C motif) ligand 1                                              | 2.7  | 1.20E-08  |
| Mnda                   | myeloid cell nuclear differentiation antigen                                | 2.2  | 3.46E-07  |
| Tnfrsf8                | tumor necrosis factor receptor superfamily, member 8                        | 2.7  | 2.96E-05  |
| Cd70                   | CD70 molecule                                                               | 3.3  | 5.04E-05  |
| Il12rb1                | interleukin 12 receptor, beta 1                                             | 2.1  | 2.89E-04  |
| <b>Metabolism</b>      |                                                                             |      |           |
| Lipg                   | lipase, endothelial                                                         | 3.4  | 2.71E-82  |
| Fads2                  | fatty acid desaturase 2                                                     | 8.2  | 4.59E-69  |
| Dhfr                   | dihydrofolate reductase                                                     | 2.2  | 1.61E-50  |
| Dhrs3                  | dehydrogenase/reductase (SDR family) member 3                               | 3.3  | 1.37E-43  |
| Ppap2a                 | phosphatidic acid phosphatase type 2A                                       | 3.1  | 6.83E-40  |
| Slc15a3                | Solute Carrier Family 15, Member 3                                          | 2.0  | 4.78E-35  |
| Fads1                  | fatty acid desaturase 1                                                     | 2.3  | 6.68E-35  |
| Slc2a1                 | solute carrier family 2 (facilitated glucose transporter), member 1 (GLUT1) | 2.0  | 2.93E-33  |
| Tpi1                   | triosephosphate isomerase 1                                                 | 2.0  | 9.09E-33  |
| Pask                   | PAS domain containing serine/threonine kinase                               | 2.1  | 4.53E-31  |
| Chst7                  | carbohydrate (N-acetylglucosamine 6-O) sulfotransferase 7                   | 3.7  | 1.93E-26  |
| Gcat                   | glycine C-acetyltransferase                                                 | 2.5  | 3.18E-25  |
| Asns                   | asparagine synthetase (glutamine-hydrolyzing)                               | 2.2  | 7.87E-19  |
| Akap1                  | A kinase (PRKA) anchor protein 1                                            | 2.1  | 2.62E-17  |
| Nampt                  | nicotinamide phosphoribosyltransferase                                      | 2.1  | 1.06E-15  |
| Slc25a13               | solute carrier family 25 (aspartate/glutamate carrier), member 13           | 2.1  | 1.33E-15  |
| Ak4                    | adenylate kinase 4                                                          | 4.1  | 9.58E-13  |
| Maoa                   | monoamine oxidase A                                                         | 2.4  | 1.42E-11  |
| Fam54a                 | Mitochondrial Fission Regulator 2                                           | 2.1  | 1.27E-10  |
| Pcx                    | pyruvate carboxylase                                                        | 2.2  | 3.22E-10  |
| Mgll                   | monoglyceride lipase                                                        | 5.1  | 4.27E-10  |
| Kcnk10                 | potassium channel, subfamily K, member 10                                   | 2.4  | 5.50E-10  |
| Car2                   | Carbonic Anhydrase II                                                       | 2.2  | 9.73E-10  |
| Fam72a                 | family with sequence similarity 72, member A                                | 2.6  | 5.02E-09  |
| Xylb                   | xylulokinase homolog (H. influenzae)                                        | 2.6  | 3.49E-08  |
| Tyms-ps                | thymidylate synthase, pseudogene                                            | 4.3  | 4.64E-08  |
| Ppp1r3b                | protein phosphatase 1, regulatory subunit 3B                                | 5.5  | 2.37E-07  |
| Car13                  | carbonic anhydrase XIII                                                     | 2.0  | 8.72E-07  |
| Slc16a3                | Solute Carrier Family 16, Member 3 (Monocarboxylic Acid Transporter 4)      | 4.7  | 8.87E-07  |
| Hilpda                 | hypoxia inducible lipid droplet-associated                                  | 3.6  | 2.31E-06  |
| Slc39a8                | solute carrier family 39 (zinc transporter), member 8                       | 2.1  | 3.62E-06  |
| Car12                  | Carbonic Anhydrase XII                                                      | 2.7  | 5.99E-06  |
| Qpct                   | glutamyl-peptide cyclotransferase                                           | 6.7  | 6.46E-06  |

|                      |                                                                      |      |           |
|----------------------|----------------------------------------------------------------------|------|-----------|
| Gatm                 | Glycine Amidinotransferase (L-Arginine:Glycine Amidinotransferase)   | 5.4  | 1.06E-05  |
| B4galt2              | UDP-Gal:betaGlcNAc beta 1,4- galactosyltransferase, polypeptide 2    | 5.6  | 5.84E-05  |
| B4galt4              | UDP-Gal:betaGlcNAc beta 1,4- galactosyltransferase, polypeptide 4    | 2.2  | 1.76E-04  |
| Nme4                 | NME/NM23 nucleoside diphosphate kinase 4                             | 2.1  | 3.25E-04  |
| Sord                 | sorbitol dehydrogenase                                               | 2.0  | 1.09E-03  |
| Nkain1               | Na+/K+ transporting ATPase interacting 1                             | 4.0  | 1.14E-03  |
| Gls2                 | glutaminase 2 (liver, mitochondrial)                                 | 2.9  | 1.70E-03  |
| Pon3                 | Paraoxonase 3                                                        | 2.0  | 1.80E-03  |
| Fads3                | fatty acid desaturase 3                                              | 3.2  | 2.02E-03  |
| Cth                  | cystathionase (cystathionine gamma-lyase)                            | 3.0  | 2.75E-03  |
| Dgat2                | Diacylglycerol O-Acyltransferase 2                                   | 2.0  | 4.90E-03  |
| <b>Other</b>         |                                                                      |      |           |
| Xist                 | X inactive specific transcript (non-protein coding)                  | 3.4  | 1.42E-226 |
| Atxn1                | ataxin 1                                                             | 2.1  | 4.39E-55  |
| Figl1                | figletin-like 1                                                      | 2.1  | 5.51E-49  |
| Nefh                 | neurofilament, heavy polypeptide                                     | 2.4  | 1.69E-30  |
| Troap                | trophinin associated protein                                         | 3.6  | 1.14E-22  |
| Mreg                 | melanoregulin                                                        | 2.2  | 1.58E-18  |
| Adm                  | adrenomedullin                                                       | 2.9  | 1.28E-15  |
| Alpl                 | alkaline phosphatase, liver/bone/kidney                              | 2.4  | 2.00E-11  |
| Mlf1                 | myeloid leukemia factor 1                                            | 5.6  | 2.33E-10  |
| Fam20c               | family with sequence similarity 20, member C                         | 3.2  | 7.62E-08  |
| Maged1               | melanoma antigen family D, 1                                         | 2.1  | 3.18E-07  |
| F9                   | coagulation factor IX                                                | 2.0  | 1.45E-06  |
| Mkl                  | mixed lineage kinase domain-like                                     | 2.0  | 1.25E-05  |
| Bmp6                 | bone morphogenetic protein 6                                         | 2.9  | 3.35E-04  |
| Gtf2ird1             | GTF2I repeat domain containing 1                                     | 2.6  | 3.36E-04  |
| Cacna1h              | calcium channel, voltage-dependent, T type, alpha 1H subunit         | 2.1  | 1.22E-03  |
| Unc13b               | unc-13 homolog B (C. elegans)                                        | 2.4  | 2.05E-03  |
| Necab3               | N-terminal EF-hand calcium binding protein 3                         | 3.3  | 3.31E-03  |
| Rarres1              | Retinoic Acid Receptor Responder (Tazarotene Induced) 1              | 5.9  | 3.62E-03  |
| Gbp1                 | guanylate binding protein 1, interferon-inducible                    | 3.4  | 6.31E-03  |
| Penk                 | proenkephalin                                                        | 6.4  | 7.18E-03  |
| Rbm24                | RNA binding motif protein 24                                         | 19.7 | 7.48E-03  |
| Tspan33              | tetraspanin 33                                                       | 2.5  | 7.57E-03  |
| <b>Proliferation</b> |                                                                      |      |           |
| Mki67 (KI-67)        | antigen identified by monoclonal antibody Ki-67                      | 3.1  | 1.32E-133 |
| Top2a                | topoisomerase (DNA) II alpha 170kDa                                  | 2.6  | 6.67E-113 |
| Ccna2                | cyclin A2                                                            | 3.6  | 2.58E-104 |
| Rrm2                 | ribonucleotide reductase M2                                          | 2.9  | 7.11E-103 |
| Cdk1                 | cyclin-dependent kinase 1                                            | 3.6  | 1.47E-92  |
| Kif11                | kinesin family member 11                                             | 2.7  | 3.80E-77  |
| Esp1                 | extra spindle pole bodies homolog 1 (S. cerevisiae)                  | 3.4  | 1.73E-76  |
| Lig1                 | ligase I, DNA, ATP-dependent                                         | 2.1  | 2.48E-72  |
| Cdk5r1               | cyclin-dependent kinase 5, regulatory subunit 1 (p35)                | 8.1  | 6.82E-66  |
| Ncapg2               | non-SMC condensin II complex, subunit G2                             | 2.3  | 1.33E-64  |
| Tyms                 | thymidylate synthetase                                               | 2.7  | 1.74E-63  |
| Tpx2                 | TPX2, microtubule-associated, homolog (Xenopus laevis)               | 3.0  | 1.60E-61  |
| Bub1                 | BUB1 mitotic checkpoint serine/threonine kinase                      | 3.1  | 1.31E-59  |
| Birc5                | baculoviral IAP repeat containing 5                                  | 3.1  | 2.08E-57  |
| Mcm10                | minichromosome maintenance complex component 10                      | 2.7  | 2.45E-57  |
| Ncapg                | Non-SMC Condensin I Complex, Subunit G                               | 2.8  | 1.43E-56  |
| Cdc45                | cell division cycle 45                                               | 2.4  | 4.19E-55  |
| Kntc1                | kinetochore associated 1                                             | 2.3  | 2.82E-54  |
| Rad51                | RAD51 homolog (S. cerevisiae)                                        | 2.3  | 1.61E-53  |
| Clspn                | claspin                                                              | 2.6  | 1.35E-52  |
| Mybl2                | v-myb myeloblastosis viral oncogene homolog (avian)-like 2           | 3.8  | 2.69E-47  |
| Kif4                 | kinesin family member 4A                                             | 2.9  | 5.72E-47  |
| Cdc6                 | cell division cycle 6                                                | 2.3  | 1.41E-46  |
| Spag5                | sperm associated antigen 5                                           | 2.7  | 1.74E-45  |
| Gins2                | GINS complex subunit 2 (Psf2 homolog)                                | 2.2  | 1.73E-42  |
| Aurkb                | aurora kinase B                                                      | 2.4  | 4.15E-41  |
| Nek2                 | NIMA-related kinase 2                                                | 3.1  | 1.40E-40  |
| E2f8                 | E2F transcription factor 8                                           | 2.8  | 3.04E-40  |
| Nuf2                 | NUF2, NDC80 kinetochore complex component, homolog (S. cerevisiae)   | 2.8  | 7.15E-40  |
| Cenpf                | centromere protein F, 350/400kDa                                     | 3.0  | 1.68E-39  |
| Ncaph                | non-SMC condensin I complex, subunit H                               | 2.2  | 2.74E-39  |
| Kif20a               | kinesin family member 20A                                            | 2.4  | 5.51E-39  |
| Fancd2               | Fanconi anemia, complementation group D2                             | 2.3  | 6.45E-39  |
| Asf1b                | ASF1 anti-silencing function 1 homolog B (S. cerevisiae)             | 2.1  | 1.43E-38  |
| Cep55                | centrosomal protein 55kDa                                            | 2.4  | 6.41E-38  |
| Rad54l               | RAD54-like (S. cerevisiae)                                           | 2.2  | 7.98E-38  |
| Exo1                 | exonuclease 1                                                        | 2.2  | 1.26E-37  |
| Spc24                | SPC24, NDC80 kinetochore complex component, homolog (S. cerevisiae)  | 2.5  | 1.32E-37  |
| Aspm                 | asp (abnormal spindle) homolog, microcephaly associated (Drosophila) | 2.7  | 1.68E-37  |
| Racgap1              | Rac GTPase activating protein 1                                      | 2.4  | 4.96E-37  |
| Cks1b                | CDC28 protein kinase regulatory subunit 1B                           | 2.0  | 9.80E-36  |
| Cdca8                | cell division cycle associated 8                                     | 2.3  | 1.26E-35  |
| Cenpe                | centromere protein E, 312kDa                                         | 2.3  | 1.62E-34  |
| Stmn1                | stathmin 1                                                           | 2.3  | 2.26E-34  |
| Kif2c                | kinesin family member 2C                                             | 3.1  | 5.30E-33  |
| Dna2                 | DNA replication helicase 2 homolog (yeast)                           | 2.9  | 3.11E-32  |
| Kif18b               | kinesin family member 18B                                            | 2.9  | 8.75E-32  |

|                              |                                                                     |     |           |
|------------------------------|---------------------------------------------------------------------|-----|-----------|
| Cdca7l                       | cell division cycle associated 7-like                               | 2.3 | 1.73E-31  |
| Pbk                          | PDZ binding kinase                                                  | 3.3 | 3.38E-30  |
| Casc5                        | cancer susceptibility candidate 5                                   | 2.3 | 7.25E-30  |
| Plk1                         | polo-like kinase 1                                                  | 3.1 | 1.36E-28  |
| Stil                         | SCL/TAL1 interrupting locus                                         | 2.2 | 4.51E-28  |
| Cit                          | citron (rho-interacting, serine/threonine kinase 21)                | 2.3 | 1.29E-27  |
| Prc1                         | protein regulator of cytokinesis 1                                  | 2.4 | 1.69E-27  |
| Fanca                        | Fanconi anemia, complementation group A                             | 2.0 | 5.37E-27  |
| Trip13                       | thyroid hormone receptor interactor 13                              | 2.0 | 2.31E-26  |
| Kif14                        | kinesin family member 14                                            | 3.0 | 5.04E-26  |
| Kif23                        | kinesin family member 23                                            | 2.2 | 1.83E-25  |
| Foxm1                        | Forkhead Box M1                                                     | 2.0 | 2.46E-25  |
| Cdca5                        | cell division cycle associated 5                                    | 2.2 | 5.73E-25  |
| Sgol1                        | shugoshin-like 1 (S. pombe)                                         | 2.5 | 5.98E-25  |
| Cenph                        | centromere protein H                                                | 2.2 | 1.33E-24  |
| Cenpi                        | centromere protein I                                                | 2.4 | 2.68E-24  |
| Kif22                        | kinesin family member 22                                            | 2.1 | 5.23E-24  |
| Bard1                        | BRCA1 associated RING domain 1                                      | 2.1 | 6.83E-24  |
| Eme1                         | essential meiotic endonuclease 1 homolog 1 (S. pombe)               | 2.6 | 1.82E-22  |
| Nusap1                       | nucleolar and spindle associated protein 1                          | 3.2 | 7.34E-22  |
| Cdca2                        | cell division cycle associated 2                                    | 2.1 | 1.69E-21  |
| Ccnb1                        | cyclin B1                                                           | 2.9 | 2.08E-21  |
| E2f7                         | E2F transcription factor 7                                          | 3.1 | 5.08E-21  |
| Ccnb2                        | cyclin B2                                                           | 2.8 | 7.99E-21  |
| Ccne2                        | cyclin E2                                                           | 2.6 | 2.81E-20  |
| Syce2                        | synaptonemal complex central element protein 2                      | 2.1 | 3.76E-20  |
| E2f1                         | E2F transcription factor 1                                          | 2.2 | 8.99E-20  |
| Cenpn                        | centromere protein N                                                | 2.1 | 1.28E-19  |
| Esco2                        | establishment of cohesion 1 homolog 2 (S. cerevisiae)               | 2.9 | 3.27E-19  |
| Cenpm                        | centromere protein M                                                | 2.4 | 6.42E-18  |
| Mis18bp1                     | MIS18 binding protein 1                                             | 2.2 | 8.42E-18  |
| Kif15                        | kinesin family member 15                                            | 2.7 | 4.35E-17  |
| Spc25                        | SPC25, NDC80 kinetochore complex component, homolog (S. cerevisiae) | 2.2 | 5.18E-17  |
| Kifc1                        | kinesin family member C1                                            | 2.5 | 3.81E-15  |
| Ckap2                        | cytoskeleton associated protein 2                                   | 2.1 | 4.16E-15  |
| Ska1                         | spindle and kinetochore associated complex subunit 1                | 2.8 | 1.47E-14  |
| Oip5                         | Opa interacting protein 5                                           | 2.2 | 3.96E-13  |
| Cenpw                        | centromere protein W                                                | 2.1 | 3.45E-11  |
| Mastl                        | Microtubule Associated Serine/Threonine Kinase-Like                 | 2.0 | 1.48E-10  |
| Myh10                        | myosin, heavy chain 10, non-muscle                                  | 2.2 | 1.55E-09  |
| Rad54b                       | RAD54 homolog B (S. cerevisiae)                                     | 2.1 | 9.69E-09  |
| Cenpp                        | centromere protein P                                                | 2.3 | 1.27E-08  |
| Pard3b                       | par-3 partitioning defective 3 homolog B (C. elegans)               | 2.2 | 2.44E-08  |
| Anln                         | anillin, actin binding protein                                      | 2.7 | 9.82E-08  |
| Fgd2                         | FYVE, RhoGEF and PH domain containing 2                             | 2.0 | 2.03E-07  |
| Kifc3                        | kinesin family member C3                                            | 4.4 | 8.26E-07  |
| Mnd1                         | meiotic nuclear divisions 1 homolog (S. cerevisiae)                 | 2.6 | 5.04E-06  |
| Fam64a                       | family with sequence similarity 64, member A                        | 2.9 | 2.70E-05  |
| Fam83d                       | Family With Sequence Similarity 83, Member D                        | 2.6 | 7.24E-05  |
| Cdc25c                       | cell division cycle 25C                                             | 2.6 | 1.38E-03  |
| Psrc1                        | proline/serine-rich coiled-coil 1                                   | 2.4 | 4.12E-03  |
| <b>Protein degradation</b>   |                                                                     |     |           |
| Siah2                        | siah E3 ubiquitin protein ligase 2                                  | 2.6 | 6.74E-53  |
| Dtl                          | denticleless E3 ubiquitin protein ligase homolog (Drosophila)       | 2.1 | 5.39E-51  |
| Uhrf1                        | Ubiquitin-Like With PHD And Ring Finger Domains 1                   | 2.1 | 9.78E-49  |
| Cdca3                        | cell division cycle associated 3                                    | 3.1 | 7.01E-47  |
| Ube2c                        | ubiquitin-conjugating enzyme E2C                                    | 3.7 | 5.56E-37  |
| Ccnf                         | cyclin F                                                            | 2.1 | 3.94E-28  |
| <b>Protein stabilization</b> |                                                                     |     |           |
| Hspa1a                       | heat shock 70kDa protein 1A                                         | 2.9 | 1.39E-03  |
| Hspa1b                       | heat shock 70kDa protein 1B                                         | 2.3 | 1.81E-03  |
| <b>RNA metabolism</b>        |                                                                     |     |           |
| Rpp25                        | ribonuclease P/MRP 25kDa subunit                                    | 3.9 | 1.05E-03  |
| <b>Signalling</b>            |                                                                     |     |           |
| Axl                          | AXL receptor tyrosine kinase                                        | 4.4 | 1.89E-256 |
| Spry2                        | sprouty homolog 2 (Drosophila)                                      | 3.2 | 1.53E-65  |
| Cst6                         | cystatin E/M                                                        | 3.5 | 1.37E-61  |
| Meik                         | maternal embryonic leucine zipper kinase                            | 3.3 | 1.57E-52  |
| Fam129a                      | family with sequence similarity 129, member A                       | 2.8 | 9.49E-48  |
| St8sia6                      | ST8 alpha-N-acetylneuraminidase alpha-2,8-sialyltransferase 6       | 2.1 | 1.35E-47  |
| Pip5k1b                      | phosphatidylinositol-4-phosphate 5-kinase, type I, beta             | 2.1 | 2.63E-46  |
| Shc3p1                       | SHC SH2-domain binding protein 1                                    | 2.6 | 5.78E-34  |
| Rgs9bp                       | regulator of G protein signaling 9 binding protein                  | 6.0 | 2.39E-33  |
| Baiap2                       | BAI1-associated protein 2                                           | 2.0 | 4.07E-27  |
| Sh3rf1                       | SH3 domain containing ring finger 1                                 | 2.2 | 4.99E-27  |
| Gpr176                       | G protein-coupled receptor 176                                      | 3.4 | 7.29E-26  |
| Ppp1r15a                     | protein phosphatase 1, regulatory subunit 15A                       | 2.1 | 7.48E-22  |
| Ttk                          | TTK protein kinase                                                  | 2.2 | 3.70E-18  |
| Pdgfra                       | platelet-derived growth factor alpha polypeptide                    | 2.0 | 3.78E-18  |
| Stk39                        | serine threonine kinase 39                                          | 4.8 | 3.15E-16  |
| Lrr1                         | leucine rich repeat protein 1                                       | 2.8 | 2.61E-15  |
| Chac1                        | ChaC, cation transport regulator homolog 1 (E. coli)                | 3.9 | 1.48E-10  |
| Bag2                         | BCL2-associated athanogene 2                                        | 2.8 | 2.02E-10  |

|                          |                                                                                        |      |           |
|--------------------------|----------------------------------------------------------------------------------------|------|-----------|
| Lrp5                     | low density lipoprotein receptor-related protein 5                                     | 2.6  | 4.15E-08  |
| <a href="#">Gpr56</a>    | G protein-coupled receptor 56                                                          | 4.6  | 6.64E-08  |
| Apold1                   | apolipoprotein L domain containing 1                                                   | 6.2  | 1.15E-07  |
| Rhobtb1                  | Rho-Related BTB Domain-Containing Protein 1                                            | 2.0  | 2.45E-07  |
| Ptpn3                    | protein tyrosine phosphatase, non-receptor type 3                                      | 2.3  | 1.79E-06  |
| Tiam1                    | T-cell lymphoma invasion and metastasis 1                                              | 2.3  | 5.45E-06  |
| <a href="#">Gng4</a>     | guanine nucleotide binding protein (G protein), gamma 4                                | 3.9  | 6.78E-06  |
| Rap1gap2                 | RAP1 GTPase activating protein 2                                                       | 2.3  | 1.36E-05  |
| Dmxl2                    | Dmx-like 2                                                                             | 2.3  | 4.55E-05  |
| Ier3                     | immediate early response 3                                                             | 4.3  | 1.65E-04  |
| Epha2                    | EPH receptor A2                                                                        | 2.3  | 4.20E-04  |
| Arl5b                    | ADP-ribosylation factor-like 5B                                                        | 2.0  | 7.99E-04  |
| Plekhg4                  | pleckstrin homology domain containing, family G (with RhoGef domain) member 4          | 3.7  | 8.01E-04  |
| Prkar2b                  | protein kinase, cAMP-dependent, regulatory, type II, beta                              | 2.1  | 9.27E-04  |
| Tnfrsf19                 | tumor necrosis factor receptor superfamily, member 19                                  | 3.6  | 1.55E-03  |
| Kif7                     | kinesin family member 7                                                                | 2.7  | 1.89E-03  |
| Ryk                      | receptor-like tyrosine kinase                                                          | 2.1  | 2.30E-03  |
| Dact3                    | dapper, antagonist of beta-catenin, homolog 3 (Xenopus laevis)                         | 2.8  | 4.08E-03  |
| <a href="#">Phlda3</a>   | pleckstrin homology-like domain, family A, member 3                                    | 3.0  | 9.96E-03  |
| <b>Transcription</b>     |                                                                                        |      |           |
| <a href="#">Rel</a>      | -                                                                                      | 12.3 | 2.94E-184 |
| Tfdp1                    | transcription factor Dp-1                                                              | 2.0  | 3.03E-47  |
| Tcf19                    | transcription factor 19                                                                | 2.2  | 1.11E-32  |
| <a href="#">Grhl1</a>    | grainyhead-like 1 (Drosophila)                                                         | 2.9  | 4.18E-32  |
| <a href="#">Snai1</a>    | snail homolog 1 (Drosophila)                                                           | 2.6  | 2.42E-11  |
| Maff                     | v-maf musculoaponeurotic fibrosarcoma oncogene homolog F (avian)                       | 2.5  | 2.44E-08  |
| Trim29                   | Tripartite Motif Containing 29                                                         | 5.8  | 9.31E-07  |
| Etv4                     | ets variant 4                                                                          | 3.1  | 1.32E-06  |
| Nr4a3                    | nuclear receptor subfamily 4, group A, member 3                                        | 2.2  | 1.49E-05  |
| Nr4a2                    | nuclear receptor subfamily 4, group A, member 2                                        | 2.4  | 1.51E-05  |
| Zik1                     | zinc finger protein interacting with K protein 1                                       | 2.1  | 2.82E-05  |
| Egr4                     | early growth response 4                                                                | 6.9  | 4.38E-05  |
| Ctdspl                   | CTD (Carboxy-Terminal Domain, RNA Polymerase II, Polypeptide A) Small Phosphatase-Like | 3.5  | 8.96E-05  |
| Msi1                     | musashi RNA-binding protein 1                                                          | 3.5  | 5.72E-04  |
| Mxd3                     | MAX dimerization protein 3                                                             | 2.0  | 5.77E-04  |
| Atf3                     | activating transcription factor 3                                                      | 2.2  | 8.66E-04  |
| <b>Transport</b>         |                                                                                        |      |           |
| <a href="#">Plscr1</a>   | phospholipid scramblase 1                                                              | 3.2  | 2.44E-58  |
| <b>Unknown</b>           |                                                                                        |      |           |
| 2810417H13Rik            |                                                                                        | 3.0  | 5.93E-108 |
| <a href="#">A1848285</a> |                                                                                        | 2.8  | 2.02E-81  |
| 5730590G19Rik            |                                                                                        | 2.2  | 4.52E-39  |
| Gm11974                  | predicted gene 11974                                                                   | 2.1  | 2.01E-34  |
| Iqgap3                   | IQ motif containing GTPase activating protein 3                                        | 3.3  | 4.44E-34  |
| Ckap2l                   | Cytoskeleton-Associated Protein 2-Like                                                 | 2.5  | 1.01E-29  |
| BC030867                 |                                                                                        | 3.0  | 1.26E-28  |
| <a href="#">BC048355</a> |                                                                                        | 3.1  | 1.54E-27  |
| Ankle1                   | ankyrin repeat and LEM domain containing 1                                             | 3.4  | 1.36E-21  |
| 2610002D18Rik            |                                                                                        | 3.3  | 7.61E-21  |
| 2010317E24Rik            |                                                                                        | 3.2  | 6.28E-20  |
| Gdap10                   | ganglioside-induced differentiation-associated-protein 10                              | 2.0  | 9.18E-19  |
| Nkg7                     | natural killer cell group 7 sequence                                                   | 6.9  | 3.93E-18  |
| Fam46c                   | family with sequence similarity 46, member C                                           | 5.0  | 1.62E-17  |
| F630043A04Rik            |                                                                                        | 2.2  | 5.37E-17  |
| Nt5dc2                   | 5'-nucleotidase domain containing 2                                                    | 2.9  | 8.52E-16  |
| C330027C09Rik            |                                                                                        | 2.0  | 1.57E-14  |
| Ankrd37                  | ankyrin repeat domain 37                                                               | 3.9  | 1.45E-12  |
| Diap3                    | diaphanous homolog 3 (Drosophila)                                                      | 2.1  | 2.75E-11  |
| 4930547N16Rik            |                                                                                        | 2.3  | 3.54E-11  |
| 1190002F15Rik            |                                                                                        | 2.6  | 6.37E-07  |
| Syna                     | synctin a                                                                              | 2.8  | 8.49E-07  |
| 9830001H06Rik            |                                                                                        | 2.6  | 2.57E-06  |
| Tnfrsf81                 | tumor necrosis factor, alpha-induced protein 8-like 1                                  | 2.4  | 5.59E-06  |
| Kdelc2                   | KDEL (Lys-Asp-Glu-Leu) containing 2                                                    | 2.2  | 7.46E-06  |
| D630045J12Rik            |                                                                                        | 2.5  | 1.33E-05  |
| Armxc4                   | armadillo repeat containing, X-linked 4                                                | 2.0  | 2.12E-05  |
| Armxc6                   | armadillo repeat containing, X-linked 6                                                | 2.0  | 2.31E-05  |
| Depdc1b                  | DEP domain containing 1B                                                               | 3.6  | 3.87E-05  |
| Stac2                    | SH3 and cysteine rich domain 2                                                         | 2.2  | 5.15E-05  |
| 4931417G12Rik            |                                                                                        | 5.4  | 1.28E-04  |
| Hpd1                     | 4-hydroxyphenylpyruvate dioxygenase-like                                               | 2.0  | 1.77E-04  |
| Tex15                    | testis expressed 15                                                                    | 2.6  | 2.44E-04  |
| Xkr5                     | XK, Kell blood group complex subunit-related family, member 5                          | 2.4  | 3.23E-04  |
| Kctd17                   | potassium channel tetramerisation domain containing 17                                 | 2.4  | 5.13E-04  |
| A330009N23Rik            |                                                                                        | 2.2  | 7.04E-04  |
| A1607873                 |                                                                                        | 3.5  | 1.15E-03  |
| Tmem98                   | transmembrane protein 98                                                               | 3.3  | 1.82E-03  |
| A1854703                 |                                                                                        | 4.2  | 2.11E-03  |
| Ildr1                    | immunoglobulin-like domain containing receptor 1                                       | 2.0  | 3.00E-03  |
| Tm4sf19                  | transmembrane 4 L six family member 19                                                 | 2.4  | 3.26E-03  |
| Ccdc102a                 | coiled-coil domain containing 102A                                                     | 3.4  | 9.26E-03  |

ordered within groups by p value (less than or equal to 0.01 p adj)

blue color: indicates genes that were identified in both 6 and 24 hour time-points

**Table S3.** A c-REL-dependent metabolic program precedes a proliferation program in activated B cells.

| BP: GO biological process | CATEGORY                         | GENESET NAME                                           | NES                               | NOM p-value            | FDR q-value |             |             |
|---------------------------|----------------------------------|--------------------------------------------------------|-----------------------------------|------------------------|-------------|-------------|-------------|
| <b>6 HRS CD40+IgM</b>     | CELLULAR METABOLISM              | GLUTAMATE_SIGNALING_PATHWAY                            | 1.647767                          | 0                      | 0.1978507   |             |             |
|                           |                                  | CARBOXYLIC_ACID_TRANSPORT                              | 1.5978355                         | 0.002205072            | 0.22779933  |             |             |
|                           |                                  | ORGANIC_ACID_TRANSPORT                                 | 1.5591958                         | 0.003351955            | 0.17676894  |             |             |
|                           |                                  | AMINO_ACID_TRANSPORT                                   | 1.5285233                         | 0.00462963             | 0.21097836  |             |             |
|                           | RNA METABOLISM                   | RNA_SPLICING                                           | 1.5812175                         | 0                      | 0.20395255  |             |             |
|                           |                                  | RNA_PROCESSING                                         | 1.569541                          | 0                      | 0.18833303  |             |             |
|                           | OTHER                            | RIBOSOME_BIOGENESIS_AND_ASSEMBLY                       | 1.5433053                         | 0.004872107            | 0.1939141   |             |             |
| <b>24 HRS CD40+IgM</b>    | CELL CYCLE ENTRY and PROGRESSION | MITOTIC_CELL_CYCLE                                     | 2.2562175                         | 0                      | 0           |             |             |
|                           |                                  | M_PHASE_OF_MITOTIC_CELL_CYCLE                          | 2.2156723                         | 0                      | 0           |             |             |
|                           | and DNA METABOLISM               | CELL_CYCLE_PROCESS                                     | 2.2120438                         | 0                      | 0           |             |             |
|                           |                                  | MITOSIS                                                | 2.1836686                         | 0                      | 0           |             |             |
|                           |                                  | CELL_CYCLE_PHASE                                       | 2.1727412                         | 0                      | 0           |             |             |
|                           |                                  | M_PHASE                                                | 2.1434066                         | 0                      | 0           |             |             |
|                           |                                  | CELL_CYCLE_GO_0007049                                  | 2.1251442                         | 0                      | 0           |             |             |
|                           |                                  | CHROMOSOME_SEGREGATION                                 | 2.0214539                         | 0                      | 0           |             |             |
|                           |                                  | REGULATION_OF_MITOSIS                                  | 1.942693                          | 0                      | 2.24E-04    |             |             |
|                           |                                  | DNA_DEPENDENT_DNA_REPLICATION                          | 1.9354295                         | 0                      | 4.16E-04    |             |             |
|                           |                                  | DNA_REPLICATION                                        | 1.9259895                         | 0                      | 5.68E-04    |             |             |
|                           |                                  | INTERPHASE_OF_MITOTIC_CELL_CYCLE                       | 1.9095057                         | 0                      | 8.60E-04    |             |             |
|                           |                                  | SISTER_CHROMATID_SEGREGATION                           | 1.8863707                         | 0                      | 0.001110423 |             |             |
|                           |                                  | MITOTIC_SISTER_CHROMATID_SEGREGATION                   | 1.8790002                         | 0                      | 0.001314917 |             |             |
|                           |                                  | CELL_CYCLE_CHECKPOINT_GO_0000075                       | 1.8742197                         | 0                      | 0.001356966 |             |             |
|                           |                                  | REGULATION_OF_CELL_CYCLE                               | 1.8621807                         | 0                      | 0.001654028 |             |             |
|                           |                                  | INTERPHASE                                             | 1.85156                           | 0                      | 0.002106091 |             |             |
|                           |                                  | CELL_DIVISION                                          | 1.8444518                         | 0                      | 0.002326212 |             |             |
|                           |                                  | DNA_METABOLIC_PROCESS                                  | 1.8121154                         | 0                      | 0.004350767 |             |             |
|                           |                                  | MICROTUBULE_CYTOSKELETON_ORGANIZATION_AND_BIOGENESIS   | 1.7850782                         | 0                      | 0.00738802  |             |             |
|                           |                                  | MITOTIC_CELL_CYCLE_CHECKPOINT                          | 1.745789                          | 0.005415163            | 0.013186095 |             |             |
|                           |                                  | ESTABLISHMENT_OF_ORGANELLE_LOCALIZATION                | 1.7273105                         | 0.003703704            | 0.01766416  |             |             |
|                           |                                  | REGULATION_OF_MITOTIC_CELL_CYCLE                       | 1.7160944                         | 0.001912046            | 0.01961962  |             |             |
|                           |                                  | DNA_REPAIR                                             | 1.7033104                         | 0.001547988            | 0.02305555  |             |             |
|                           |                                  | ORGANELLE_LOCALIZATION                                 | 1.6685276                         | 0.014571949            | 0.031142432 |             |             |
|                           |                                  | G1_S_TRANSITION_OF_MITOTIC_CELL_CYCLE                  | 1.6450824                         | 0.003717472            | 0.040345866 |             |             |
|                           |                                  | RESPONSE_TO_DNA_DAMAGE_STIMULUS                        | 1.6312721                         | 0                      | 0.046828076 |             |             |
|                           |                                  | REGULATION_OF_CYCLIN_DEPENDENT_PROTEIN_KINASE_ACTIVITY | 1.6239511                         | 0.005535055            | 0.049538534 |             |             |
|                           |                                  | DNA_RECOMBINATION                                      | 1.5927386                         | 0.005424955            | 0.063328385 |             |             |
|                           |                                  | DNA_INTEGRITY_CHECKPOINT                               | 1.5717627                         | 0.012411348            | 0.07375563  |             |             |
|                           |                                  | DNA_PACKAGING                                          | 1.5389353                         | 0.005145798            | 0.09855357  |             |             |
|                           |                                  | CHROMOSOME_ORGANIZATION_AND_BIOGENESIS                 | 1.5399941                         | 0.003246753            | 0.100344524 |             |             |
|                           |                                  | CELL_PROLIFERATION_GO_0008283                          | 1.523904                          | 0                      | 0.112375684 |             |             |
|                           |                                  | DOUBLE_STRAND_BREAK_REPAIR                             | 1.5045915                         | 0.035650622            | 0.123235166 |             |             |
|                           |                                  | REGULATION_OF_DNA_METABOLIC_PROCESS                    | 1.4797735                         | 0.015679443            | 0.13732934  |             |             |
|                           |                                  | MICROTUBULE_BASED_PROCESS                              | 1.4801308                         | 0.010084034            | 0.13956076  |             |             |
|                           |                                  | REGULATION_OF_DNA_REPLICATION                          | 1.4817907                         | 0.048387095            | 0.14019424  |             |             |
|                           |                                  | NUCLEOBASENUCLEOSIDE_AND_NUCLEOTIDE_METABOLIC_PROCESS  | 1.4351289                         | 0.021543985            | 0.18732354  |             |             |
|                           |                                  | ORGANELLE_ORGANIZATION_AND_BIOGENESIS                  | 1.4290395                         | 0                      | 0.19066665  |             |             |
|                           |                                  | CELLULAR METABOLISM                                    | CARBOXYLIC_ACID_TRANSPORT         | 1.6121563              | 0.003424658 | 0.054313682 |             |
|                           |                                  |                                                        | TRNA_METABOLIC_PROCESS            | 1.5933466              | 0.009487666 | 0.06477512  |             |
|                           |                                  |                                                        | ORGANIC_ACID_TRANSPORT            | 1.5833919              | 0.003552398 | 0.06900686  |             |
|                           |                                  |                                                        | ELECTRON_TRANSPORT_GO_0006118     | 1.5214355              | 0.013400335 | 0.11254809  |             |
|                           |                                  |                                                        | LIPID_BIOSYNTHETIC_PROCESS        | 1.5081948              | 0.003252032 | 0.12241391  |             |
|                           |                                  |                                                        | STEROID_BIOSYNTHETIC_PROCESS      | 1.4741639              | 0.028933093 | 0.14141886  |             |
|                           |                                  |                                                        | HORMONE_METABOLIC_PROCESS         | 1.4864851              | 0.031894933 | 0.14327794  |             |
|                           |                                  |                                                        | MITOCHONDRIAL_TRANSPORT           | 1.4295087              | 0.041825093 | 0.19332403  |             |
|                           |                                  |                                                        | ALCOHOL_METABOLIC_PROCESS         | 1.403899               | 0.017152658 | 0.21728891  |             |
|                           |                                  |                                                        | STEROID_METABOLIC_PROCESS         | 1.4005066              | 0.03305785  | 0.21976508  |             |
|                           |                                  |                                                        | CARBOXYLIC_ACID_METABOLIC_PROCESS | 1.388847               | 0.011217949 | 0.23711126  |             |
|                           |                                  |                                                        | CELLULAR_BIOSYNTHETIC_PROCESS     | 1.3856027              | 0.004273505 | 0.2394752   |             |
|                           |                                  |                                                        | ORGANIC_ACID_METABOLIC_PROCESS    | 1.3765271              | 0.01898734  | 0.24176563  |             |
|                           |                                  |                                                        | CELLULAR_LIPID_METABOLIC_PROCESS  | 1.3737426              | 0.001529052 | 0.24321777  |             |
|                           |                                  |                                                        | RNA METABOLISM                    | RRNA_METABOLIC_PROCESS | 1.7201879   | 0.009578544 | 0.019018956 |
|                           |                                  |                                                        |                                   | RNA_PROCESSING         | 1.69008     | 0           | 0.02604897  |
|                           |                                  |                                                        | RRNA_PROCESSING                   | 1.6769708              | 0           | 0.028756496 |             |
|                           |                                  |                                                        | RNA_SPLICING                      | 1.5803995              | 0.001694915 | 0.06952343  |             |
|                           |                                  | MRNA_PROCESSING_GO_0006397                             | 1.4589359                         | 0.023728814            | 0.15953502  |             |             |
|                           | OTHER                            | RESPONSE_TO_ENDOGENOUS_STIMULUS                        | 1.519018                          | 0                      | 0.112858325 |             |             |
|                           |                                  | PATTERN_SPECIFICATION_PROCESS                          | 1.4820087                         | 0.025089607            | 0.1428012   |             |             |
|                           |                                  | REGULATION_OF_BLOOD_PRESSURE                           | 1.483316                          | 0.042513862            | 0.14440466  |             |             |
|                           |                                  | PROTEIN_FOLDING                                        | 1.4254373                         | 0.031914894            | 0.1924746   |             |             |
|                           |                                  | RIBOSOME_BIOGENESIS_AND_ASSEMBLY                       | 1.6836034                         | 0.009328358            | 0.02707364  |             |             |
| CP: KEGG: KEGG gene sets  | CATEGORY                         | GENESET NAME                                           | NES                               | NOM p-value            | FDR q-value |             |             |
| <b>6 HRS CD40+IgM</b>     | CELLULAR METABOLISM              | KEGG_PYRIMIDINE_METABOLISM                             | 1.514874                          | 0.001044932            | 0.091122    |             |             |
|                           |                                  | KEGG_GLYCINE_SERINE_AND_THREONINE_METABOLISM           | 1.5207639                         | 0.004581902            | 0.10584206  |             |             |
|                           |                                  | KEGG_AMINOACYL_TRNA_BIOSYNTHESIS                       | 1.5249261                         | 0.003348214            | 0.13237898  |             |             |
|                           |                                  | KEGG_PENTOSE_PHOSPHATE_PATHWAY                         | 1.4355496                         | 0.019630484            | 0.21421596  |             |             |
|                           |                                  | KEGG_LINOLEIC_ACID_METABOLISM                          | 1.4221715                         | 0.022836538            | 0.22587317  |             |             |
|                           | RNA METABOLISM                   | KEGG_SPLICIOSOME                                       | 1.5285051                         | 0                      | 0.19070262  |             |             |
|                           | OTHER                            | KEGG_MATURITY_ONSET_DIABETES_OF_THE_YOUNG              | 1.586597                          | 0.00234192             | 0.13196608  |             |             |

|                        |                                         |                                              |           |             |             |
|------------------------|-----------------------------------------|----------------------------------------------|-----------|-------------|-------------|
|                        |                                         | KEGG_P53_SIGNALING_PATHWAY                   | 1.4687734 | 0.003181336 | 0.15700944  |
| <b>24 HRS CD40+IgM</b> | <b>CELLULAR METABOLISM</b>              | KEGG_ONE_CARBON_POOL_BY_FOLATE               | 1.837495  | 0           | 0.006142664 |
|                        |                                         | KEGG_ARGININE_AND_PROLINE_METABOLISM         | 1.7927383 | 0           | 0.006493236 |
|                        |                                         | KEGG_PYRIMIDINE_METABOLISM                   | 1.7951747 | 0           | 0.007861392 |
|                        |                                         | KEGG_TERPENOID_BACKBONE_BIOSYNTHESIS         | 1.7267377 | 0           | 0.009907804 |
|                        |                                         | KEGG_OXIDATIVE_PHOSPHORYLATION               | 1.7130511 | 0           | 0.010289431 |
|                        |                                         | KEGG_AMINOACYL_TRNA_BIOSYNTHESIS             | 1.7414619 | 0.001831502 | 0.010306698 |
|                        |                                         | KEGG_PENTOSE_PHOSPHATE_PATHWAY               | 1.6541762 | 0.005725191 | 0.017636057 |
|                        |                                         | KEGG_RETINOL_METABOLISM                      | 1.6565747 | 0.00177305  | 0.018445348 |
|                        |                                         | KEGG_GLYCINE_SERINE_AND_THREONINE_METABOLISM | 1.5795099 | 0.010733453 | 0.031617846 |
|                        |                                         | KEGG_PHENYLALANINE_METABOLISM                | 1.5569662 | 0.009505703 | 0.03917478  |
|                        |                                         | KEGG_GLYCEROLIPID_METABOLISM                 | 1.5388736 | 0.01048951  | 0.04598379  |
|                        |                                         | KEGG_GALACTOSE_METABOLISM                    | 1.5277787 | 0.033158813 | 0.04707884  |
|                        |                                         | KEGG_BIOSYNTHESIS_OF_UNSATURATED_FATTY_ACIDS | 1.5217346 | 0.02559415  | 0.04811833  |
|                        |                                         | KEGG_FRUCTOSE_AND_MANNANOSE_METABOLISM       | 1.5278103 | 0.009225092 | 0.04912575  |
|                        |                                         | KEGG_PURINE_METABOLISM                       | 1.5087196 | 0.006319115 | 0.052561156 |
|                        |                                         | KEGG_GLYCOLYSIS_GLUCONEOGENESIS              | 1.4797087 | 0.014010508 | 0.06643744  |
|                        |                                         | KEGG_DRUG_METABOLISM_CYTOCHROME_P450         | 1.4458034 | 0.035185184 | 0.077699766 |
|                        |                                         | KEGG_CITRATE_CYCLE_TCA_CYCLE                 | 1.446333  | 0.035916824 | 0.07969638  |
|                        |                                         | KEGG_PYRUVATE_METABOLISM                     | 1.4476432 | 0.027874565 | 0.08090103  |
|                        |                                         | KEGG_TYROSINE_METABOLISM                     | 1.4495525 | 0.021937843 | 0.08252497  |
|                        |                                         | KEGG_PPAR_SIGNALING_PATHWAY                  | 1.3579651 | 0.042517006 | 0.14217804  |
|                        | <b>CELL CYCLE ENTRY and PROGRESSION</b> | KEGG_DNA_REPLICATION                         | 2.115131  | 0           | 0           |
|                        |                                         | KEGG_CELL_CYCLE                              | 2.0138788 | 0           | 0           |
|                        | <b>and DNA METABOLISM</b>               | KEGG_HOMOLOGOUS_RECOMBINATION                | 1.7834507 | 0           | 0.006396068 |
|                        |                                         | KEGG_MISMATCH_REPAIR                         | 1.7401252 | 0.001683502 | 0.009271333 |
|                        |                                         | KEGG_NUCLEOTIDE_EXCISION_REPAIR              | 1.6489205 | 0.003378379 | 0.017707538 |
|                        |                                         | KEGG_BASE_EXCISION_REPAIR                    | 1.617916  | 0.005300353 | 0.025743468 |
|                        | <b>RNA METABOLISM</b>                   | KEGG_SPLICEOSOME                             | 1.6973053 | 0           | 0.011115047 |
|                        | <b>OTHER</b>                            | KEGG_PARKINSONS_DISEASE                      | 1.5905601 | 0.004761905 | 0.03230945  |
|                        |                                         | KEGG_HUNTINGTONS_DISEASE                     | 1.5820765 | 0           | 0.032353114 |
|                        |                                         | KEGG_OOCYTE_MEIOSIS                          | 1.5840557 | 0           | 0.03334049  |
|                        |                                         | KEGG_PROTEASOME                              | 1.4845436 | 0.025773196 | 0.06570404  |
|                        |                                         | KEGG_DRUG_METABOLISM_CYTOCHROME_P450         | 1.4458034 | 0.035185184 | 0.077699766 |
|                        |                                         | KEGG_ALZHEIMERS_DISEASE                      | 1.4576428 | 0.003095975 | 0.07904794  |
|                        |                                         | KEGG_PROGESTERONE_MEDIATED_OOCYTE_MATURATION | 1.426582  | 0.021630615 | 0.089418225 |
|                        |                                         | KEGG_P53_SIGNALING_PATHWAY                   | 1.4183191 | 0.024263432 | 0.093365915 |

**Table S4.** Genes not induced in RELA-deficient vs. wild-type B cells by  $\geq 2$ -fold.

**6 hours CD40 + IgM stimulation**

| gene                                   | gene name                                                           | fold change | padj        |
|----------------------------------------|---------------------------------------------------------------------|-------------|-------------|
| <b>Cytoskeleton&amp;structure</b>      |                                                                     |             |             |
| Marcks1                                | MARCKS-like 1                                                       | 2.0         | 1.07E-87    |
| Hspg2                                  | perlecan (heparan sulfate proteoglycan 2)                           | 2.9         | 1.74E-80    |
| Lgals3bp                               | lectin, galactoside-binding, soluble, 3 binding protein             | 2.6         | 1.92E-47    |
| Psrc1                                  | proline/serine-rich coiled-coil 1                                   | 2.6         | 3.59E-41    |
| Sdc3                                   | syndecan 3                                                          | 2.2         | 1.43E-22    |
| Mid1 (TRIM18)                          | midline 1                                                           | 2.1         | 2.88E-19    |
| Zfp365                                 | zinc finger protein 365                                             | 3.2         | 1.86E-11    |
| Stag3                                  | stromal antigen 3                                                   | 2.1         | 2.45E-10    |
| Chst1                                  | carbohydrate (keratan sulfate Gal-6) sulfotransferase 1             | 5.2         | 0.008894984 |
| <b>Apoptosis</b>                       |                                                                     |             |             |
| Xaf1                                   | XIAP associated factor 1                                            | 2.3         | 3.09E-49    |
| Tnfrsf10b                              | tumor necrosis factor receptor superfamily, member 10b              | 2.5         | 1.48E-24    |
| Serpina3g                              | serine (or cysteine) peptidase inhibitor, clade A, member 3G        | 2.2         | 3.62E-11    |
| <b>Immune response (antimicrobial)</b> |                                                                     |             |             |
| Ddx58                                  | DEAD (Asp-Glu-Ala-Asp) box polypeptide 58                           | 2.1         | 1.65E-80    |
| Zbp1                                   | Z-DNA binding protein 1                                             | 2.5         | 1.05E-79    |
| Oas3                                   | 2'-5' oligoadenylate synthetase 3                                   | 2.5         | 1.17E-57    |
| SIfn5                                  | schlafen 5                                                          | 2.7         | 1.68E-57    |
| Mx1                                    | myxovirus (influenza virus) resistance 1                            | 2.5         | 4.06E-49    |
| Rtp4                                   | receptor transporter protein 4 (28kD interferon responsive protein) | 2.7         | 1.23E-47    |
| Trim30d                                | tripartite motif-containing 30D                                     | 2.0         | 1.13E-43    |
| Irf7                                   | interferon regulatory factor 7                                      | 2.5         | 4.39E-35    |
| Trim30a                                | tripartite motif-containing 30A                                     | 2.0         | 5.42E-34    |
| Isg20                                  | interferon-stimulated protein                                       | 2.5         | 8.93E-30    |
| Oasl2                                  | 2'-5' oligoadenylate synthetase-like 2                              | 2.3         | 8.43E-26    |
| Isg15                                  | ISG15 ubiquitin-like modifier                                       | 2.3         | 1.78E-23    |
| Mx2                                    | myxovirus (influenza virus) resistance 2                            | 2.5         | 1.19E-21    |
| Dhx58                                  | DEXH (Asp-Glu-X-His) box polypeptide 58                             | 2.1         | 6.39E-19    |
| Gbp6                                   | guanylate binding protein 6                                         | 2.1         | 9.07E-19    |
| Ifitm3                                 | interferon induced transmembrane protein 3                          | 2.0         | 9.37E-15    |
| Rsad2                                  | radical S-adenosyl methionine domain containing 2                   | 2.2         | 2.35E-13    |
| Usp18                                  | ubiquitin specific peptidase 18                                     | 2.3         | 9.50E-13    |
| Ifit3                                  | interferon-induced protein with tetratricopeptide repeats 3         | 2.8         | 5.95E-12    |
| Ifit1                                  | interferon-induced protein with tetratricopeptide repeats 1         | 2.5         | 7.31E-08    |
| Gbp10                                  | guanylate-binding protein 10                                        | 2.6         | 1.01E-06    |
| Ifit2                                  | interferon-induced protein with tetratricopeptide repeats 2         | 2.2         | 1.07E-06    |
| Ifi44                                  | interferon-induced protein 44                                       | 2.4         | 5.51E-05    |
| <b>Immune response</b>                 |                                                                     |             |             |
| Csf1                                   | colony stimulating factor 1 (macrophage)                            | 2.2         | 4.06E-47    |
| Tnfrsf9 (CD137)                        | tumor necrosis factor receptor superfamily, member 9                | 2.0         | 4.68E-19    |
| Igj                                    | immunoglobulin joining chain                                        | 2.2         | 3.50E-12    |
| Tnfrsf4 (CD134L)                       | tumor necrosis factor (ligand) superfamily, member 4                | 2.2         | 4.24E-06    |
| Il15                                   | interleukin 15                                                      | 2.2         | 0.009964831 |
| <b>Signalling</b>                      |                                                                     |             |             |
| Axl                                    | AXL receptor tyrosine kinase                                        | 2.0         | 2.23E-111   |
| Phlda3                                 | pleckstrin homology-like domain, family A, member 3                 | 2.6         | 8.88E-27    |
| <b>Other</b>                           |                                                                     |             |             |
| Epha2                                  | Eph receptor A2                                                     | 2.1         | 8.10E-08    |
| Smoc1                                  | SPARC related modular calcium binding 1                             | 3.0         | 3.51E-06    |
| <b>Unknown</b>                         |                                                                     |             |             |
| 9030617O03Rik                          |                                                                     | 2.7         | 3.17E-34    |
| Pydc4                                  | pyrin domain containing 4                                           | 2.4         | 2.33E-30    |
| 6530418L21Rik (Fam212b)                | family with sequence similarity 212, member B                       | 2.6         | 4.94E-30    |
| Pydc3                                  | pyrin domain containing 3                                           | 2.2         | 6.11E-30    |
| Gm12250                                |                                                                     | 2.0         | 2.81E-16    |
| G530011O06Rik                          |                                                                     | 2.0         | 1.84E-14    |
| I830012O16Rik                          |                                                                     | 2.6         | 5.05E-09    |
| Gm5431                                 | predicted gene 5431                                                 | 2.4         | 6.12E-05    |
| C130083M11Rik                          |                                                                     | 2.0         | 0.000270942 |
| Lmo7                                   | LIM domain only 7                                                   | 2.1         | 0.000659593 |
| <b>Metabolism</b>                      |                                                                     |             |             |
| Cmpk2                                  | cytidine monophosphate (UMP-CMP) kinase 2, mitochondrial            | 2.1         | 4.20E-14    |
| Pla1a                                  | phospholipase A1 member A                                           | 2.2         | 0.002062752 |
| Gatm                                   | glycine amidinotransferase (L-arginine:glycine amidinotransferase)  | 2.7         | 0.002559054 |
| <b>Cell trafficking</b>                |                                                                     |             |             |
| Cxcl10                                 | chemokine (C-X-C motif) ligand 10                                   | 2.5         | 3.80E-08    |
| Cxcr7                                  | chemokine (C-X-C motif) receptor 7                                  | 2.7         | 3.83E-08    |
| Ccr12                                  | chemokine (C-C motif) receptor-like 2                               | 2.0         | 0.000369833 |
| S1pr2                                  | sphingosine-1-phosphate receptor 2                                  | 2.1         | 0.001110386 |
| Madcam1                                | mucosal vascular addressin cell adhesion molecule 1                 | 27.9        | 0.001360544 |
| <b>Transcription</b>                   |                                                                     |             |             |
| Rela                                   | v-rel reticuloendotheliosis viral oncogene homolog A (avian)        | 5.3         | 1.29E-195   |

ordered within groups by p value (less than or equal to 0.01 p adj)

blue color: indicates genes that were identified as not upregulated in both RELA and c-REL-deficient cultures

**Table S5.** Antibodies used for flow cytometry (FC), immunohistochemistry (IHC), ELISA (EL) and Western blot (WB) analysis.

| Molecule/<br>Antigen         | Application | Species | Fluorochrome/<br>Conjugate | Source  | Clone   | Manufacturer           |
|------------------------------|-------------|---------|----------------------------|---------|---------|------------------------|
| β-Actin                      | WB          | mouse   | -                          | mouse   | AC-15   | Sigma                  |
| B220                         | IHC         | mouse   | Biotin                     | rat     | RA3-6B2 | BD Pharmingen          |
| B220                         | FC          | mouse   | PE-CF594                   | rat     | RA3-6B2 | BD Horizon             |
| B220                         | FC          | mouse   | PerCP                      | rat     | RA3-6B2 | BD Pharmingen          |
| BCL2                         | WB          | human   | -                          | rabbit  | SC-783  | Santa Cruz             |
| BCL6                         | IHC         | mouse   | -                          | rabbit  | N-3     | Santa Cruz             |
| BLIMP1                       | WB          | mouse   | -                          | rat     | 6D3     | Santa Cruz             |
| CD16/CD32                    | FC          | mouse   | -                          | rat     | 2.4G2   | BD Pharmingen          |
| CD38                         | FC          | mouse   | Alexa Fluor 700            | rat     | 90      | eBioscience            |
| CD138                        | FC          | mouse   | PE                         | rat     | 281-2   | BD Pharmingen          |
| CD86                         | FC          | mouse   | APC                        | rat     | GL1     | eBioscience            |
| CD95                         | FC          | mouse   | PE                         | hamster | Jo2     | BD Pharmingen          |
| c-Myc                        | WB          | mouse   | -                          | rabbit  | Y69     | Abcam                  |
| c-Rel                        | WB, IHC     | mouse   | -                          | rabbit  | C       | Santa Cruz             |
| CXCR4                        | FC          | mouse   | PerCP-eFluor 710           | rat     | 2B11    | eBioscience            |
| Cyclin D3                    | IHC         | mouse   | -                          | rabbit  | DCS22   | Cell Signaling         |
| GFP                          | IHC         | mouse   | Alexa Fluor 555            | rabbit  | -       | Invitrogen             |
| IgG1                         | FC          | mouse   | APC                        | rat     | X56     | BD Pharmingen          |
| IgG1                         | IHC, EL     | mouse   | AP                         | goat    | -       | Southern Biotech       |
| IgM                          | IHC, EL     | mouse   | AP                         | goat    | -       | Southern Biotech       |
| IRF4                         | WB          | mouse   | -                          | goat    | M-17    | Santa Cruz             |
| NF-κB p65                    | WB          | mouse   | -                          | rabbit  | C-20    | Santa Cruz             |
| NP(8)                        | FC          | mouse   | PE                         | -       | -       | Biosearch Technologies |
| PNA                          | FC          | mouse   | Biotin                     | -       | -       | Vector Laboratories    |
| Streptavidin                 | FC          | mouse   | APC                        | -       | -       | BD Pharmingen          |
| Streptavidin                 | FC          | mouse   | eFluor 450                 | -       | -       | eBioscience            |
| <b>Secondary antibodies:</b> |             |         |                            |         |         |                        |
| Anti-Goat IgG                | WB          |         | HRP                        | donkey  |         | Santa Cruz             |
| Anti-Mouse IgG               | WB          |         | HRP                        | goat    |         | Thermo Scientific      |
| Anti-Rabbit IgG              | WB          |         | HRP                        | donkey  |         | GE Healthcare          |
| Anti-Rat IgG                 | WB          |         | HRP                        | goat    |         | GE Healthcare          |



**Table S6.** Primer sequences used for quantitative RT-PCR analysis. All primer pairs were validated by analysis of standard curves (efficiency of 90-110%) and dissociation curves to yield one single peak.

| <i>Gene symbol</i> | <i>Forward primer</i>    | <i>Reverse primer</i>   | <i>Source</i>                                                                |
|--------------------|--------------------------|-------------------------|------------------------------------------------------------------------------|
| <i>Fads2</i>       | GGTGGTTGTAGGGCAGGTATT    | ACCGACATTTCCAACACCAT    | NCBI Mouse PrimerDepot                                                       |
| <i>Hprt1</i>       | AGCTACTGTAATGATCAGTCAACG | AGAGGTCCTTTTCACCAGCA    | RTPrimerDB<br>( <a href="http://www.rtprimerdb.org">www.rtprimerdb.org</a> ) |
| <i>Phgdh</i>       | AGGTGGTGGAGAAGCAGAACTTG  | CAGCAGTGACCTTAGTAGCAGAC | In-house design                                                              |
| <i>Pla2g16</i>     | GTCTGCTTTGACTGACAAGGC    | GTGTACTCCTCGTCATGTTTGTT | In-house design                                                              |
| <i>Slc7a6</i>      | AAGATGGTAGGTGGGTGTGG     | GAGGAGGTAGCTGGCGAGG     | NCBI Mouse PrimerDepot                                                       |
